# Supplementary material
Source: PubMed Central journal article supplement (PMC10239297)
Supplement: EMS170629-supplement-Supplementary_Material.pdf [file EMS170629-supplement-Supplementary_Material.pdf]

# **Supplementary Material**

## **Title:**

*Temporal trends in the incidence of malignant and nonmalignant primary brain and central nervous system tumors by the method of diagnosis in England, 1993-2017*

## **Running Title:**

*Temporal trends in CNS tumor incidence in England, 1993-2017*

Usama M. Ali<sup>1</sup>, Diana R. Withrow<sup>2</sup>, Andrew D. Judge<sup>3,4</sup>, Puneet Plaha<sup>5,6</sup>, Sarah C. Darby<sup>1</sup>

1. Nuffield Department of Population Health, University of Oxford, Oxford, United Kingdom (UMA, SCD)
2. Nuffield Department of Primary Care Health Sciences, University of Oxford, Oxford, United Kingdom (DRW)
3. Nuffield Department of Orthopaedics, Rheumatology and Musculoskeletal Sciences, University of Oxford, Oxford, United Kingdom (ADJ)
4. Bristol NIHR Biomedical Research Centre and University of Bristol, Bristol, United Kingdom (ADJ)
5. Nuffield Department of Surgical Sciences, University of Oxford, Oxford, United Kingdom (PP)
6. Department of Neurosurgery, John Radcliffe Hospital, Oxford University Hospital NHS Foundation Trust, West Wing, Level 3, Oxford, United Kingdom (PP)

## **Corresponding author:**

Usama M. Ali, MSc

Nuffield Department of Population Health, University of Oxford

Richard Doll Building, Roosevelt Drive, Oxford, OX3 7LF, United Kingdom

E-mail: [usama.ali@wolfson.ox.ac.uk](mailto:usama.ali@wolfson.ox.ac.uk) ; Telephone: +44 (0)1865 743849

ORCID iD: 0000-0003-0313-4429

# Contents

**Supplementary Table 1.** Method of diagnosis criteria used by NCRAS as outlined in the International Classification of Diseases for Oncology Third Edition (ICD-O-3)

**Supplementary Table 2.** ICD-10 and ICD-9 Topography codes for tumors of the central nervous system (CNS)

**Supplementary Table 3.** Patient and tumor characteristics of 188,340 individuals diagnosed with a primary CNS tumor according to method of diagnosis – England, 1993-2017 (*column percentages*)

**Supplementary Table 4.** Comparison of Age-Sex-Standardized Incidence Rates (ASR) per 100,000 using different standard populations for 9,835 individuals diagnosed with a primary CNS tumor according to tumor behavior<sup>a</sup> and method of diagnosis – England, 2017 only

**Supplementary Figure 1.** Comparison of standard population weights – European (2013), United States (2000) and World (1960)

**Supplementary Table 5a.** Age-Sex-Standardized Incidence Rates (ASR) per 100,000 for calendar years 1993 and 2017 separately and Average Annual Percentage Change (AAPC) for 188,340 individuals diagnosed with a primary CNS tumor according to behavior, anatomical location<sup>a</sup> and method of diagnosis – England, 1993-2017 - Malignant brain tumors, benign meningeal tumors and all other tumors combined

**Supplementary Table 5b.** Age-Sex-Standardized Incidence Rates (ASR) per 100,000 for calendar years 1993 and 2017 separately and Average Annual Percentage Change (AAPC) for 188,340 individuals diagnosed with a primary CNS tumor according to behavior, anatomical location<sup>a</sup> and method of diagnosis – England, 1993-2017 - Malignant tumors only

**Supplementary Table 5c.** Age-Sex-Standardized Incidence Rates (ASR) per 100,000 for calendar years 1993 and 2017 separately and Average Annual Percentage Change (AAPC) for 188,340 individuals diagnosed with a primary CNS tumor according to behavior, anatomical location<sup>a</sup> and method of diagnosis – England, 1993-2017 - Benign tumors only

**Supplementary Table 5d.** Age-Sex-Standardized Incidence Rates (ASR) per 100,000 for calendar years 1993 and 2017 separately and Average Annual Percentage Change (AAPC) for 188,340 individuals diagnosed with a primary CNS tumor according to behavior, anatomical location<sup>a</sup> and method of diagnosis – England, 1993-2017 - Uncertain tumors only

**Supplementary Figure 2.** Incidence rate of primary CNS tumors by method of diagnosis, age-group and index of multiple deprivation (IMD) - England, 2001-2017

**Supplementary Figure 3.** Incidence rate of primary CNS tumors by anatomical location, method of diagnosis and age-group - England, 1993-2017 - Malignant tumors only

**Supplementary Figure 4.** Incidence of primary CNS tumors by anatomical location, method of diagnosis and age-group - England, 1993-2017 - Benign tumors only

**Supplementary Figure 5.** Incidence of primary CNS tumors by anatomical location, method of diagnosis and age-group - England, 1993-2017 - Uncertain tumors only

**Supplementary Table 1. Method of diagnosis criteria used by NCRAS as outlined in the International Classification of Diseases for Oncology Third Edition (ICD-O-3)**

| Code | Description                  | Criteria                                                                                                                                                                                           | n       | %  | Category for this study    |
|------|------------------------------|----------------------------------------------------------------------------------------------------------------------------------------------------------------------------------------------------|---------|----|----------------------------|
| 0    | Death Certificate Only (DCO) | Information provided is from a death certificate                                                                                                                                                   | 5,729   | 3  | Other                      |
| 1    | Clinical                     | Diagnosis made before death, but without any of the following (codes 2-7).                                                                                                                         | 12,435  | 7  | Other                      |
| 2    | Clinical investigation       | All diagnostic techniques, including x-ray, endoscopy, imaging, ultrasound, exploratory surgery (e.g., laparotomy), and autopsy, without a tissue diagnosis.                                       | 42,057  | 22 | Radiographically Confirmed |
| 3    | Other special tests          | Other special tests - no longer used                                                                                                                                                               | 36      | 0  | Other                      |
| 4    | Specific tumor markers       | Including biochemical and/or immunological markers that are specific for a tumor site.                                                                                                             | 39      | 0  | Other                      |
| 5    | Cytology                     | Examination of cells from a primary or secondary site, including fluids aspirated by endoscopy or needle; also includes the microscopic examination of peripheral blood and bone marrow aspirates. | 268     | 0  | Other                      |
| 6    | Histology of a metastasis    | Histologic examination of tissue from a metastasis, including autopsy specimens                                                                                                                    | 95      | 0  | Other                      |
| 7    | Histology of a primary tumor | Histologic examination of tissue from primary tumor, however obtained, including all cutting techniques and bone marrow biopsies; also includes autopsy specimens of primary tumor.                | 124,190 | 66 | Microscopically Confirmed  |
| 9    | Unknown                      | No information on how the diagnosis has been made                                                                                                                                                  | 3,491   | 2  | Other                      |

*Note: Counts and percentages are for the entire study period 1993-2017*

Supplementary Table 2. ICD-10 and ICD-9 Topography codes for tumors of the central nervous system (CNS)

| Description                                                                                               | ICD-10 Code | ICD-9 Code |
|-----------------------------------------------------------------------------------------------------------|-------------|------------|
| <b><i>Malignant neoplasm of meninges</i></b>                                                              | <b>C70</b>  | <b>192</b> |
| Cerebral meninges                                                                                         | C70.0       | 192.1      |
| Spinal meninges                                                                                           | C70.1       | 192.3      |
| Meninges, unspecified                                                                                     | C70.9       | 192.9      |
| <b><i>Malignant neoplasm of brain</i></b>                                                                 | <b>C71</b>  | <b>191</b> |
| Cerebrum, except lobes and ventricles                                                                     | C71.0       | 191.0      |
| Frontal lobe                                                                                              | C71.1       | 191.1      |
| Temporal lobe                                                                                             | C71.2       | 191.2      |
| Parietal lobe                                                                                             | C71.3       | 191.3      |
| Occipital lobe                                                                                            | C71.4       | 191.4      |
| Cerebral ventricle                                                                                        | C71.5       | 191.5      |
| Cerebellum                                                                                                | C71.6       | 191.6      |
| Brain stem                                                                                                | C71.7       | 191.7      |
| Overlapping lesion of brain                                                                               | C71.8       | 191.8      |
| Brain, unspecified                                                                                        | C71.9       | 191.9      |
| <b><i>Malignant neoplasm of spinal cord, cranial nerves and other parts of central nervous system</i></b> | <b>C72</b>  | <b>192</b> |
| Spinal cord                                                                                               | C72.0       | 192.2      |
| Cauda equina                                                                                              | C72.1       | 192.2      |
| Olfactory nerve                                                                                           | C72.2       | 192.0      |
| Optic nerve                                                                                               | C72.3       | 192.0      |
| Acoustic nerve                                                                                            | C72.4       | 192.0      |
| Other and unspecified cranial nerves                                                                      | C72.5       | 192.0      |
| Overlapping lesion of brain and other parts of CNS                                                        | C72.8       | 192.8      |
| Central nervous system, unspecified                                                                       | C72.9       | 192.9      |
| <b><i>Malignant neoplasm of other endocrine glands and related structures</i></b>                         | <b>C75</b>  | <b>194</b> |
| Pituitary gland                                                                                           | C75.1       | 194.3      |
| Craniopharyngeal duct                                                                                     | C75.2       | 194.3      |
| Pineal gland                                                                                              | C75.3       | 194.4      |
| <b><i>Benign neoplasm of meninges</i></b>                                                                 | <b>D32</b>  | <b>225</b> |
| Cerebral meninges                                                                                         | D32.0       | 225.2      |
| Spinal meninges                                                                                           | D32.1       | 225.4      |
| Meninges, unspecified                                                                                     | D32.9       | 225.9      |
| <b><i>Benign neoplasm of brain and other parts of CNS</i></b>                                             | <b>D33</b>  | <b>225</b> |
| Brain, supratentorial                                                                                     | D33.0       | 225.0      |
| Brain, infratentorial                                                                                     | D33.1       | 225.0      |
| Brain, unspecified                                                                                        | D33.2       | 225.9      |
| Cranial nerves                                                                                            | D33.3       | 225.1      |
| Spinal cord                                                                                               | D33.4       | 225.3      |
| Other specified parts of the CNS                                                                          | D33.7       | 225.8      |
| Central nervous system, unspecified                                                                       | D33.9       | 225.9      |
| <b><i>Benign neoplasm of other and unspecified endocrine glands</i></b>                                   | <b>D35</b>  | <b>227</b> |
| Pituitary gland                                                                                           | D35.2       | 227.3      |
| Craniopharyngeal duct                                                                                     | D35.3       | 227.3      |
| Pineal gland                                                                                              | D35.4       | 227.4      |
| <b><i>Neoplasm of uncertain or unknown behavior of meninges</i></b>                                       | <b>D42</b>  | <b>237</b> |
| Cerebral meninges                                                                                         | D42.0       | 237.6      |
| Spinal meninges                                                                                           | D42.1       | 237.6      |
| Meninges, unspecified                                                                                     | D42.9       | 237.9      |
| <b><i>Neoplasm of uncertain or unknown behavior of brain and CNS</i></b>                                  | <b>D43</b>  | <b>237</b> |
| Brain, supratentorial                                                                                     | D43.0       | 237.5      |
| Brain, infratentorial                                                                                     | D43.1       | 237.5      |
| Brain, unspecified                                                                                        | D43.2       | 237.9      |
| Cranial nerves                                                                                            | D43.3       | 237.9      |
| Spinal cord                                                                                               | D43.4       | 237.5      |
| Other parts of CNS                                                                                        | D43.7       | 237.9      |
| Central nervous system, unspecified                                                                       | D43.9       | 237.9      |
| <b><i>Neoplasm of uncertain or unknown behavior of endocrine glands</i></b>                               | <b>D44</b>  | <b>237</b> |
| Pituitary gland                                                                                           | D44.3       | 237.0      |
| Craniopharyngeal duct                                                                                     | D44.4       | 237.0      |
| Pineal gland                                                                                              | D44.5       | 237.1      |

**Supplementary Table 3. Patient and tumor characteristics of 188,340 individuals diagnosed with a primary CNS tumor according to method of diagnosis – England, 1993-2017 (column percentages)**

| Characteristic                                                  | MC     |         | RC     |         | Other  |         | Total   |         |
|-----------------------------------------------------------------|--------|---------|--------|---------|--------|---------|---------|---------|
|                                                                 | n      | %       | n      | %       | n      | %       | n       | %       |
| <b>Sex</b>                                                      |        |         |        |         |        |         |         |         |
| Male                                                            | 64,124 | 52      | 18,679 | 44      | 10,444 | 47      | 93,247  | 50      |
| Female                                                          | 60,066 | 48      | 23,378 | 56      | 11,649 | 53      | 95,093  | 50      |
| <b>Age-group at diagnosis</b>                                   |        |         |        |         |        |         |         |         |
| Pediatric (0-14)                                                | 7,600  | 6       | 1,197  | 3       | 404    | 2       | 9,201   | 5       |
| Teenagers & Young Adults (15-24)                                | 4,890  | 4       | 642    | 2       | 393    | 2       | 5,925   | 3       |
| Adults (25-64)                                                  | 75,596 | 61      | 10,530 | 25      | 6,066  | 27      | 92,192  | 49      |
| Older People (65-84)                                            | 35,252 | 28      | 22,843 | 54      | 11,847 | 54      | 69,942  | 37      |
| Elderly (85+)                                                   | 852    | 1       | 6,845  | 16      | 3,383  | 15      | 11,080  | 6       |
| <b>Age at diagnosis</b>                                         |        |         |        |         |        |         |         |         |
| Median (IQR)                                                    | 55     | (41-66) | 74     | (61-82) | 73     | (60-81) | 61      | (46-73) |
| <b>Year of diagnosis</b>                                        |        |         |        |         |        |         |         |         |
| 1993                                                            | 3,569  | 3       | 558    | 1       | 1,444  | 7       | 5,571   | 3       |
| 1994                                                            | 3,630  | 3       | 772    | 2       | 1,167  | 5       | 5,569   | 3       |
| 1995                                                            | 3,949  | 3       | 835    | 2       | 1,305  | 6       | 6,089   | 3       |
| 1996                                                            | 4,208  | 3       | 746    | 2       | 1,186  | 5       | 6,140   | 3       |
| 1997                                                            | 4,369  | 4       | 836    | 2       | 1,244  | 6       | 6,449   | 3       |
| 1998                                                            | 4,381  | 4       | 864    | 2       | 1,092  | 5       | 6,337   | 3       |
| 1999                                                            | 4,283  | 3       | 849    | 2       | 1,383  | 6       | 6,515   | 3       |
| 2000                                                            | 4,475  | 4       | 1,132  | 3       | 1,181  | 5       | 6,788   | 4       |
| 2001                                                            | 4,478  | 4       | 1,195  | 3       | 952    | 4       | 6,625   | 4       |
| 2002                                                            | 4,646  | 4       | 1,289  | 3       | 769    | 3       | 6,704   | 4       |
| 2003                                                            | 4,569  | 4       | 1,328  | 3       | 752    | 3       | 6,649   | 4       |
| 2004                                                            | 4,841  | 4       | 1,494  | 4       | 647    | 3       | 6,982   | 4       |
| 2005                                                            | 5,061  | 4       | 1,422  | 3       | 808    | 4       | 7,291   | 4       |
| 2006                                                            | 5,091  | 4       | 1,474  | 4       | 739    | 3       | 7,304   | 4       |
| 2007                                                            | 5,407  | 4       | 1,608  | 4       | 659    | 3       | 7,674   | 4       |
| 2008                                                            | 5,645  | 5       | 1,701  | 4       | 864    | 4       | 8,210   | 4       |
| 2009                                                            | 5,284  | 4       | 1,988  | 5       | 865    | 4       | 8,057   | 4       |
| 2010                                                            | 5,304  | 4       | 1,988  | 5       | 805    | 4       | 8,097   | 4       |
| 2011                                                            | 5,367  | 4       | 2,023  | 5       | 756    | 3       | 8,146   | 4       |
| 2012                                                            | 5,312  | 4       | 2,307  | 5       | 921    | 4       | 8,540   | 5       |
| 2013                                                            | 6,081  | 5       | 2,511  | 6       | 1,009  | 5       | 9,601   | 5       |
| 2014                                                            | 5,951  | 5       | 3,031  | 7       | 564    | 3       | 9,546   | 5       |
| 2015                                                            | 6,102  | 5       | 3,289  | 8       | 462    | 2       | 9,853   | 5       |
| 2016                                                            | 6,063  | 5       | 3,433  | 8       | 272    | 1       | 9,768   | 5       |
| 2017                                                            | 6,124  | 5       | 3,464  | 8       | 247    | 1       | 9,835   | 5       |
| <b>Tumor behavior<sup>a</sup></b>                               |        |         |        |         |        |         |         |         |
| Malignant                                                       | 66,684 | 54      | 20,280 | 48      | 11,067 | 50      | 98,031  | 52      |
| Benign                                                          | 46,033 | 37      | 17,076 | 41      | 6,249  | 28      | 69,358  | 37      |
| Uncertain                                                       | 11,473 | 9       | 4,701  | 11      | 4,777  | 22      | 20,951  | 11      |
| <b>Anatomical location<sup>b</sup></b>                          |        |         |        |         |        |         |         |         |
| Meninges (C70.0-C70.9, D32.0-D32.9, D42.0-D42.9)                | 26,604 | 21      | 11,518 | 27      | 4,121  | 19      | 42,243  | 22      |
| Brain (C71.0-C71.9, D33.0-D33.2, D43.0-D43.2)                   | 70,620 | 57      | 23,447 | 56      | 14,325 | 65      | 108,463 | 58      |
| Spinal Cord & Other CNS (C72.0-C72.9, D33.3-D33.9, D43.3-D43.9) | 12,318 | 10      | 3,466  | 8       | 1,545  | 7       | 17,329  | 9       |
| Endocrine CNS (C75.1-C75.3, D35.2-D35.4, D44.3-D44.5)           | 14,648 | 12      | 3,626  | 9       | 2,102  | 10      | 20,305  | 11      |
| <b>Anatomical location according to behavior</b>                |        |         |        |         |        |         |         |         |
| <b>Malignant</b>                                                |        |         |        |         |        |         |         |         |
| Meninges                                                        | 1,129  | 1       | 332    | 1       | 276    | 1       | 1,737   | 1       |
| Brain                                                           | 62,760 | 51      | 19,224 | 46      | 10,266 | 46      | 92,250  | 49      |
| Spinal Cord & Other CNS                                         | 1,948  | 2       | 552    | 1       | 295    | 1       | 2,795   | 1       |
| Endocrine Glands in CNS                                         | 847    | 1       | 172    | 0       | 230    | 1       | 1,249   | 1       |
| <b>Benign</b>                                                   |        |         |        |         |        |         |         |         |
| Meninges                                                        | 23,194 | 19      | 10,936 | 26      | 3,676  | 17      | 37,806  | 20      |
| Brain                                                           | 1,842  | 1       | 559    | 1       | 335    | 2       | 2,736   | 1       |
| Spinal Cord & Other CNS                                         | 8,996  | 7       | 2,652  | 6       | 1,012  | 5       | 12,660  | 7       |
| Endocrine Glands in CNS                                         | 12,001 | 10      | 2,929  | 7       | 1,226  | 6       | 16,156  | 9       |
| <b>Uncertain</b>                                                |        |         |        |         |        |         |         |         |
| Meninges                                                        | 2,281  | 2       | 250    | 1       | 169    | 1       | 2,700   | 1       |
| Brain                                                           | 6,018  | 5       | 3,664  | 9       | 3,724  | 17      | 13,406  | 7       |
| Spinal Cord & Other CNS                                         | 1,374  | 1       | 262    | 1       | 238    | 1       | 1,874   | 1       |
| Endocrine Glands in CNS                                         | 1,800  | 1       | 525    | 1       | 646    | 3       | 2,971   | 2       |
| <b>ICD-10 Site</b>                                              |        |         |        |         |        |         |         |         |
| Cerebral meninges (C70.0)                                       | 815    | 1       | 242    | 1       | 166    | 1       | 1,223   | 1       |
| Spinal meninges (C70.1)                                         | 110    | 0       | 13     | 0       | 13     | 0       | 136     | 0       |
| Meninges, unspecified (C70.9)                                   | 286    | 0       | 112    | 0       | 121    | 1       | 519     | 0       |
| Cerebrum, except lobes and ventricles (C71.0)                   | 3,183  | 3       | 1,387  | 3       | 987    | 4       | 5,557   | 3       |
| Frontal lobe (C71.1)                                            | 16,202 | 13      | 2,940  | 7       | 904    | 4       | 20,046  | 11      |
| Temporal lobe (C71.2)                                           | 12,432 | 10      | 1,996  | 5       | 584    | 3       | 15,012  | 8       |
| Parietal lobe (C71.3)                                           | 10,340 | 8       | 2,098  | 5       | 691    | 3       | 13,129  | 7       |
| Occipital lobe (C71.4)                                          | 2,485  | 2       | 398    | 1       | 158    | 1       | 3,041   | 2       |
| Cerebral ventricle (C71.5)                                      | 697    | 1       | 115    | 0       | 56     | 0       | 868     | 0       |
| Cerebellum (C71.6)                                              | 3,565  | 3       | 261    | 1       | 212    | 1       | 4,038   | 2       |
| Brain stem (C71.7)                                              | 1,196  | 1       | 655    | 2       | 235    | 1       | 2,086   | 1       |
| Overlapping lesion of brain (C71.8)                             | 3,732  | 3       | 1,415  | 3       | 366    | 2       | 5,513   | 3       |
| Brain, unspecified (C71.9)                                      | 11,454 | 9       | 8,016  | 19      | 6,130  | 28      | 25,600  | 14      |
| Spinal cord (C72.0)                                             | 1,602  | 1       | 159    | 0       | 138    | 1       | 1,899   | 1       |
| Cauda equina (C72.1)                                            | 18     | 0       | 2      | 0       | 2      | 0       | 22      | 0       |
| Olfactory nerve (C72.2)                                         | 46     | 0       | 2      | 0       | 8      | 0       | 56      | 0       |

Continued overleaf

Supplementary Table 3 continued.

| Characteristic                                             | MC             |            | RC            |            | Other        |            | Total          |            |
|------------------------------------------------------------|----------------|------------|---------------|------------|--------------|------------|----------------|------------|
|                                                            | n              | %          | n             | %          | n            | %          | n              | %          |
| Optic nerve (C72.3)                                        | 282            | 0          | 347           | 1          | 66           | 0          | 695            | 0          |
| Acoustic nerve (C72.4)                                     | 36             | 0          | 9             | 0          | 11           | 0          | 56             | 0          |
| Other and unspecified cranial nerves (C72.5)               | 157            | 0          | 41            | 0          | 34           | 0          | 232            | 0          |
| Overlapping lesion of brain and other parts of CNS (C72.8) | 15             | 0          | 4             | 0          | 7            | 0          | 26             | 0          |
| Central nervous system, unspecified (C72.9)                | 73             | 0          | 21            | 0          | 37           | 0          | 131            | 0          |
| Pituitary gland (C75.1)                                    | 292            | 0          | 128           | 0          | 195          | 1          | 615            | 0          |
| Craniopharyngeal duct (C75.2)                              | 4              | 0          | 1             | 0          | 5            | 0          | 10             | 0          |
| Pineal gland (C75.3)                                       | 628            | 1          | 64            | 0          | 51           | 0          | 743            | 0          |
| Cerebral meninges (D32.0)                                  | 17,187         | 14         | 8,483         | 20         | 2,253        | 10         | 27,923         | 15         |
| Spinal meninges (D32.1)                                    | 1,988          | 2          | 140           | 0          | 76           | 0          | 2,204          | 1          |
| Meninges, unspecified (D32.9)                              | 3,938          | 3          | 2,278         | 5          | 1,324        | 6          | 7,540          | 4          |
| Brain, supratentorial (D33.0)                              | 889            | 1          | 176           | 0          | 71           | 0          | 1,136          | 1          |
| Brain, infratentorial (D33.1)                              | 262            | 0          | 42            | 0          | 31           | 0          | 335            | 0          |
| Brain, unspecified (D33.2)                                 | 801            | 1          | 345           | 1          | 229          | 1          | 1,375          | 1          |
| Cranial nerves (D33.3)                                     | 7,131          | 6          | 2,496         | 6          | 937          | 4          | 10,564         | 6          |
| Spinal cord (D33.4)                                        | 1,580          | 1          | 114           | 0          | 43           | 0          | 1,737          | 1          |
| Other specified parts of the CNS (D33.7)                   | 34             | 0          | 0             | 0          | 5            | 0          | 39             | 0          |
| Central nervous system, unspecified (D33.9)                | 216            | 0          | 33            | 0          | 21           | 0          | 270            | 0          |
| Pituitary gland (D35.2)                                    | 11,911         | 10         | 2,899         | 7          | 1,207        | 5          | 16,017         | 9          |
| Craniopharyngeal duct (D35.3)                              | 4              | 0          | 1             | 0          | 1            | 0          | 6              | 0          |
| Pineal gland (D35.4)                                       | 20             | 0          | 13            | 0          | 2            | 0          | 35             | 0          |
| Cerebral meninges (D42.0)                                  | 1,835          | 1          | 173           | 0          | 84           | 0          | 2,092          | 1          |
| Spinal meninges (D42.1)                                    | 81             | 0          | 8             | 0          | 11           | 0          | 100            | 0          |
| Meninges, unspecified (D42.9)                              | 364            | 0          | 69            | 0          | 73           | 0          | 506            | 0          |
| Brain, supratentorial (D43.0)                              | 1,103          | 1          | 1,216         | 3          | 708          | 3          | 3,027          | 2          |
| Brain, infratentorial (D43.1)                              | 864            | 1          | 212           | 1          | 203          | 1          | 1,279          | 1          |
| Brain, unspecified (D43.2)                                 | 1,415          | 1          | 2,175         | 5          | 2,760        | 12         | 6,350          | 3          |
| Cranial nerves (D43.3)                                     | 56             | 0          | 79            | 0          | 53           | 0          | 188            | 0          |
| Spinal cord (D43.4)                                        | 945            | 1          | 111           | 0          | 76           | 0          | 1,132          | 1          |
| Other parts of CNS (D43.7)                                 | 2              | 0          | 1             | 0          | 7            | 0          | 10             | 0          |
| Central nervous system, unspecified (D43.9)                | 125            | 0          | 47            | 0          | 100          | 0          | 272            | 0          |
| Pituitary gland (D44.3)                                    | 490            | 0          | 291           | 1          | 480          | 2          | 1,261          | 1          |
| Craniopharyngeal duct (D44.4)                              | 1,115          | 1          | 158           | 0          | 127          | 1          | 1,400          | 1          |
| Pineal gland (D44.5)                                       | 184            | 0          | 71            | 0          | 34           | 0          | 289            | 0          |
| <b>Total (all CNS tumors)</b>                              | <b>124,553</b> | <b>100</b> | <b>54,567</b> | <b>100</b> | <b>5,729</b> | <b>100</b> | <b>188,340</b> | <b>100</b> |

**Abbreviations:** MC, microscopically confirmed; RC, radiographically confirmed; CNS, central nervous system.

<sup>a</sup> Behavior based on the 5th digit of the ICD-O-3 histology code.

<sup>b</sup> Anatomical location based on the ICD-10 topography code.

**Supplementary Table 4. Comparison of Age-Sex-Standardized Incidence Rates (ASR) per 100,000 using different standard populations for 9,835 individuals diagnosed with a primary CNS tumor according to tumor behavior<sup>a</sup> and method of diagnosis – England, 2017 only**

| Characteristic                   | Method of Diagnosis | n     | %   | European (2013) |             | United States (2000) |             | World (1960) |             |
|----------------------------------|---------------------|-------|-----|-----------------|-------------|----------------------|-------------|--------------|-------------|
|                                  |                     |       |     | ASR             | 95% CI      | ASR                  | 95% CI      | ASR          | 95% CI      |
| <b>All CNS Tumors</b>            |                     |       |     |                 |             |                      |             |              |             |
| All ages                         | All                 | 9,835 | 100 | 18.6            | (18.2,18.9) | 15.1                 | (14.8,15.4) | 11.9         | (11.6,12.1) |
|                                  | MC                  | 6,124 | 62  | 11.5            | (11.2,11.8) | 9.8                  | (9.6,10.1)  | 8.5          | (8.2,8.7)   |
|                                  | RC                  | 3,464 | 35  | 6.6             | (6.4,6.8)   | 4.9                  | (4.7,5.1)   | 3.2          | (3.0,3.3)   |
|                                  | Other               | 247   | 3   | 0.5             | (0.4,0.5)   | 0.4                  | (0.3,0.4)   | 0.2          | (0.2,0.3)   |
| <b>All CNS Tumors</b>            |                     |       |     |                 |             |                      |             |              |             |
| Pediatric (0-14)                 | All                 | 422   | 100 | 4.2             | (3.8,4.6)   | 4.2                  | (3.8,4.6)   | 4.2          | (3.8,4.6)   |
|                                  | MC                  | 341   | 81  | 3.4             | (3.0,3.7)   | 3.4                  | (3.0,3.7)   | 3.4          | (3.1,3.8)   |
|                                  | RC                  | 69    | 16  | 0.7             | (0.5,0.8)   | 0.7                  | (0.5,0.8)   | 0.7          | (0.5,0.8)   |
|                                  | Other               | 12    | 3   | 0.1             | (0.1,0.2)   | 0.1                  | (0.1,0.2)   | 0.1          | (0.1,0.2)   |
| Teenagers & Young Adults (15-24) | All                 | 298   | 100 | 4.5             | (4.0,5.0)   | 4.4                  | (3.9,4.9)   | 4.4          | (3.9,4.9)   |
|                                  | MC                  | 235   | 79  | 3.5             | (3.1,4.0)   | 3.5                  | (3.0,3.9)   | 3.5          | (3.0,3.9)   |
|                                  | RC                  | 59    | 20  | 0.9             | (0.7,1.1)   | 0.9                  | (0.6,1.1)   | 0.9          | (0.6,1.1)   |
|                                  | Other               | 4     | 1   | 0.1             | (0.0,0.2)   | 0.1                  | (0.0,0.1)   | 0.1          | (0.0,0.1)   |
| Adults (25-64)                   | All                 | 4,688 | 100 | 16.6            | (16.1,17.0) | 15.3                 | (14.8,15.7) | 15.1         | (14.6,15.5) |
|                                  | MC                  | 3,598 | 77  | 12.7            | (12.3,13.1) | 11.8                 | (11.4,12.2) | 11.6         | (11.2,12.0) |
|                                  | RC                  | 1,025 | 22  | 3.6             | (3.4,3.9)   | 3.3                  | (3.1,3.5)   | 3.2          | (3.0,3.5)   |
|                                  | Other               | 65    | 1   | 0.2             | (0.2,0.3)   | 0.2                  | (0.2,0.3)   | 0.2          | (0.2,0.3)   |
| Older People (65-84)             | All                 | 3,783 | 100 | 43.7            | (42.3,45.1) | 43.9                 | (42.5,45.3) | 42.6         | (41.1,44.0) |
|                                  | MC                  | 1,911 | 51  | 22.0            | (21.0,23.0) | 21.7                 | (20.8,22.7) | 23.9         | (22.8,25.0) |
|                                  | RC                  | 1,748 | 46  | 20.2            | (19.3,21.2) | 20.7                 | (19.7,21.6) | 17.4         | (16.6,18.3) |
|                                  | Other               | 124   | 3   | 1.4             | (1.2,1.7)   | 1.5                  | (1.2,1.7)   | 1.2          | (1.0,1.5)   |
| Elderly (85+)                    | All                 | 644   | 100 | 47.5            | (43.8,51.2) | 47.6                 | (44.0,51.3) | 47.6         | (44.0,51.3) |
|                                  | MC                  | 39    | 6   | 2.8             | (1.9,3.7)   | 2.9                  | (2.0,3.8)   | 2.9          | (2.0,3.8)   |
|                                  | RC                  | 563   | 87  | 41.5            | (38.1,45.0) | 41.6                 | (38.2,45.1) | 41.6         | (38.2,45.1) |
|                                  | Other               | 42    | 7   | 3.2             | (2.2,4.1)   | 3.1                  | (2.2,4.0)   | 3.1          | (2.2,4.0)   |
| <b>Malignant behavior</b>        |                     |       |     |                 |             |                      |             |              |             |
| Pediatric (0-14)                 | All                 | 223   | 100 | 2.2             | (1.9,2.5)   | 2.2                  | (1.9,2.5)   | 2.3          | (2.0,2.6)   |
|                                  | MC                  | 182   | 82  | 1.8             | (1.5,2.0)   | 1.8                  | (1.5,2.0)   | 1.9          | (1.6,2.1)   |
|                                  | RC                  | 36    | 16  | 0.4             | (0.2,0.5)   | 0.4                  | (0.2,0.5)   | 0.4          | (0.2,0.5)   |
|                                  | Other               | 5     | 2   | 0.1             | (0.0,0.3)   | 0.1                  | (0.0,0.3)   | 0.1          | (0.0,0.3)   |
| Teenagers & Young Adults (15-24) | All                 | 123   | 100 | 1.8             | (1.5,2.2)   | 1.8                  | (1.5,2.2)   | 1.8          | (1.5,2.1)   |
|                                  | MC                  | 108   | 88  | 1.6             | (1.3,1.9)   | 1.6                  | (1.5,2.0)   | 1.6          | (1.3,1.9)   |
|                                  | RC                  | 13    | 11  | 0.2             | (0.1,0.3)   | 0.2                  | (0.2,0.5)   | 0.2          | (0.1,0.3)   |
|                                  | Other               | 2     | 2   | 0.0             | (0.0,0.1)   | 0.0                  | (0.0,0.3)   | 0.0          | (0.0,0.1)   |
| Adults (25-64)                   | All                 | 1,973 | 100 | 7.0             | (6.7,7.3)   | 6.3                  | (6.0,6.6)   | 6.3          | (6.0,6.6)   |
|                                  | MC                  | 1,767 | 90  | 6.2             | (5.9,6.5)   | 5.7                  | (1.5,2.0)   | 5.6          | (5.4,5.9)   |
|                                  | RC                  | 187   | 9   | 0.7             | (0.6,0.8)   | 0.6                  | (0.2,0.5)   | 0.6          | (0.5,0.7)   |
|                                  | Other               | 19    | 1   | 0.1             | (0.1,0.1)   | 0.1                  | (0.0,0.3)   | 0.1          | (0.0,0.1)   |
| Older People (65-84)             | All                 | 1,966 | 100 | 22.7            | (21.7,23.7) | 22.8                 | (21.8,23.8) | 22.1         | (21.1,23.1) |
|                                  | MC                  | 1,105 | 56  | 12.7            | (12.0,13.5) | 12.5                 | (1.5,2.0)   | 14.0         | (13.2,14.9) |
|                                  | RC                  | 798   | 41  | 9.3             | (8.6,9.9)   | 9.5                  | (0.2,0.5)   | 7.4          | (6.9,8.0)   |
|                                  | Other               | 63    | 3   | 0.7             | (0.5,0.9)   | 0.7                  | (0.0,0.3)   | 0.6          | (0.5,0.8)   |
| Elderly (85+)                    | All                 | 283   | 100 | 20.9            | (18.4,23.3) | 20.9                 | (18.5,23.4) | 20.9         | (18.5,23.4) |
|                                  | MC                  | 14    | 5   | 1.0             | (0.5,1.6)   | 1.0                  | (1.5,2.0)   | 1.0          | (0.5,1.6)   |
|                                  | RC                  | 251   | 89  | 18.5            | (16.2,20.8) | 18.6                 | (0.2,0.5)   | 18.6         | (16.3,20.9) |
|                                  | Other               | 18    | 6   | 1.3             | (0.7,2.0)   | 1.3                  | (0.0,0.3)   | 1.3          | (0.7,1.9)   |
| <b>Benign behavior</b>           |                     |       |     |                 |             |                      |             |              |             |
| Pediatric (0-14)                 | All                 | 37    | 100 | 0.4             | (0.3,0.5)   | 0.4                  | (0.3,0.5)   | 0.4          | (0.2,0.5)   |
|                                  | MC                  | 25    | 68  | 0.3             | (0.2,0.4)   | 0.3                  | (1.5,2.0)   | 0.2          | (0.1,0.3)   |
|                                  | RC                  | 10    | 27  | 0.1             | (0.1,0.2)   | 0.1                  | (0.2,0.5)   | 0.2          | (0.1,0.2)   |
|                                  | Other               | 2     | 5   | 0.0             | (0.0,0.1)   | 0.0                  | (0.0,0.3)   | 0.0          | (0.0,0.1)   |
| Teenagers & Young Adults (15-24) | All                 | 95    | 100 | 1.4             | (1.1,1.7)   | 1.4                  | (1.1,1.7)   | 1.4          | (1.1,1.7)   |
|                                  | MC                  | 56    | 59  | 0.8             | (0.6,1.1)   | 0.8                  | (1.5,2.0)   | 0.8          | (0.6,1.0)   |
|                                  | RC                  | 38    | 40  | 0.6             | (0.4,0.8)   | 0.6                  | (0.2,0.5)   | 0.6          | (0.4,0.7)   |
|                                  | Other               | 1     | 1   | 0.0             | (0.0,0.1)   | 0.0                  | (0.0,0.3)   | 0.0          | (0.0,0.1)   |
| Adults (25-64)                   | All                 | 2,263 | 100 | 8.0             | (7.7,8.3)   | 7.5                  | (7.1,7.8)   | 7.3          | (7.0,7.6)   |
|                                  | MC                  | 1,462 | 65  | 5.2             | (4.9,5.4)   | 4.9                  | (1.5,2.0)   | 4.7          | (4.5,5.0)   |
|                                  | RC                  | 767   | 34  | 2.7             | (2.5,2.9)   | 2.5                  | (0.2,0.5)   | 2.4          | (2.2,2.6)   |
|                                  | Other               | 34    | 2   | 0.1             | (0.1,0.2)   | 0.1                  | (0.0,0.3)   | 0.1          | (0.1,0.2)   |
| Older People (65-84)             | All                 | 1,559 | 100 | 18.0            | (17.1,18.9) | 18.1                 | (17.2,19.0) | 17.6         | (16.7,18.5) |
|                                  | MC                  | 668   | 43  | 7.7             | (7.1,8.3)   | 7.6                  | (1.5,2.0)   | 8.1          | (7.5,8.8)   |
|                                  | RC                  | 850   | 55  | 9.8             | (9.2,10.5)  | 9.9                  | (0.2,0.5)   | 9.1          | (8.4,9.7)   |
|                                  | Other               | 41    | 3   | 0.5             | (0.3,0.6)   | 0.5                  | (0.0,0.3)   | 0.4          | (0.3,0.5)   |
| Elderly (85+)                    | All                 | 312   | 100 | 23.0            | (20.4,25.5) | 23.1                 | (20.5,25.6) | 23.1         | (20.5,25.6) |
|                                  | MC                  | 22    | 7   | 1.6             | (0.9,2.3)   | 1.6                  | (1.5,2.0)   | 1.6          | (0.9,2.3)   |
|                                  | RC                  | 269   | 86  | 19.8            | (17.4,22.2) | 19.9                 | (0.2,0.5)   | 19.9         | (17.5,22.3) |
|                                  | Other               | 21    | 7   | 1.6             | (0.9,2.3)   | 1.6                  | (0.0,0.3)   | 1.6          | (0.9,2.2)   |

Continued overleaf

Supplementary Table 4 continued.

| Characteristic                   | Method of Diagnosis | n   | %   | European (2013) |           | United States (2000) |           | World (1960) |           |
|----------------------------------|---------------------|-----|-----|-----------------|-----------|----------------------|-----------|--------------|-----------|
|                                  |                     |     |     | ASR             | 95% CI    | ASR                  | 95% CI    | ASR          | 95% CI    |
| <b>Uncertain behavior</b>        |                     |     |     |                 |           |                      |           |              |           |
| Pediatric (0-14)                 | All                 | 162 | 100 | 1.6             | (1.4,1.9) | 1.6                  | (1.4,1.9) | 1.6          | (1.4,1.9) |
|                                  | MC                  | 134 | 83  | 1.3             | (1.1,1.6) | 1.3                  | (1.5,2.0) | 1.3          | (1.1,1.5) |
|                                  | RC                  | 23  | 14  | 0.2             | (0.1,0.3) | 0.2                  | (0.2,0.5) | 0.2          | (0.1,0.3) |
|                                  | Other               | 5   | 3   | 0.0             | (0.0,0.1) | 0.0                  | (0.0,0.3) | 0.1          | (0.0,0.1) |
| Teenagers & Young Adults (15-24) | All                 | 80  | 100 | 1.2             | (0.9,1.5) | 1.2                  | (0.9,1.5) | 1.2          | (0.9,1.5) |
|                                  | MC                  | 71  | 89  | 1.1             | (0.8,1.3) | 1.1                  | (1.5,2.0) | 1.1          | (0.8,1.3) |
|                                  | RC                  | 8   | 10  | 0.1             | (0.0,0.2) | 0.1                  | (0.2,0.5) | 0.1          | (0.0,0.2) |
|                                  | Other               | 1   | 1   | 0.0             | (0.0,0.1) | 0.0                  | (0.0,0.3) | 0.0          | (0.0,0.1) |
| Adults (25-64)                   | All                 | 452 | 100 | 1.6             | (1.4,1.7) | 1.5                  | (1.4,1.7) | 1.5          | (1.4,1.7) |
|                                  | MC                  | 369 | 82  | 1.3             | (1.2,1.4) | 1.2                  | (1.5,2.0) | 1.2          | (1.1,1.4) |
|                                  | RC                  | 71  | 16  | 0.2             | (0.2,0.3) | 0.2                  | (0.2,0.5) | 0.2          | (0.2,0.3) |
|                                  | Other               | 12  | 3   | 0.1             | (0.0,0.1) | 0.1                  | (0.0,0.3) | 0.1          | (0.0,0.1) |
| Older People (65-84)             | All                 | 258 | 100 | 3.0             | (2.6,3.3) | 3.0                  | (2.6,3.3) | 2.9          | (2.5,3.2) |
|                                  | MC                  | 138 | 53  | 1.6             | (1.3,1.9) | 1.6                  | (1.5,2.0) | 1.7          | (1.4,2.0) |
|                                  | RC                  | 100 | 39  | 1.1             | (0.9,1.4) | 1.2                  | (0.2,0.5) | 0.9          | (0.7,1.1) |
|                                  | Other               | 20  | 8   | 0.2             | (0.1,0.3) | 0.2                  | (0.0,0.3) | 0.2          | (0.1,0.3) |
| Elderly (85+)                    | All                 | 49  | 100 | 3.7             | (2.6,4.7) | 3.6                  | (2.6,4.6) | 3.6          | (2.6,4.6) |
|                                  | MC                  | 3   | 6   | 0.4             | (0.0,0.7) | 0.2                  | (1.5,2.0) | 0.2          | (0.0,0.5) |
|                                  | RC                  | 43  | 88  | 3.2             | (2.3,4.2) | 3.2                  | (0.2,0.5) | 3.2          | (2.2,4.1) |
|                                  | Other               | 3   | 6   | 0.2             | (0.0,0.5) | 0.2                  | (0.0,0.3) | 0.2          | (0.0,0.5) |

**Abbreviations:** MC, microscopically confirmed; RC, radiographically confirmed; CNS, central nervous system.

<sup>a</sup> Behavior based on the 5th digit of the ICD-O-3 histology code.



Percentage of population

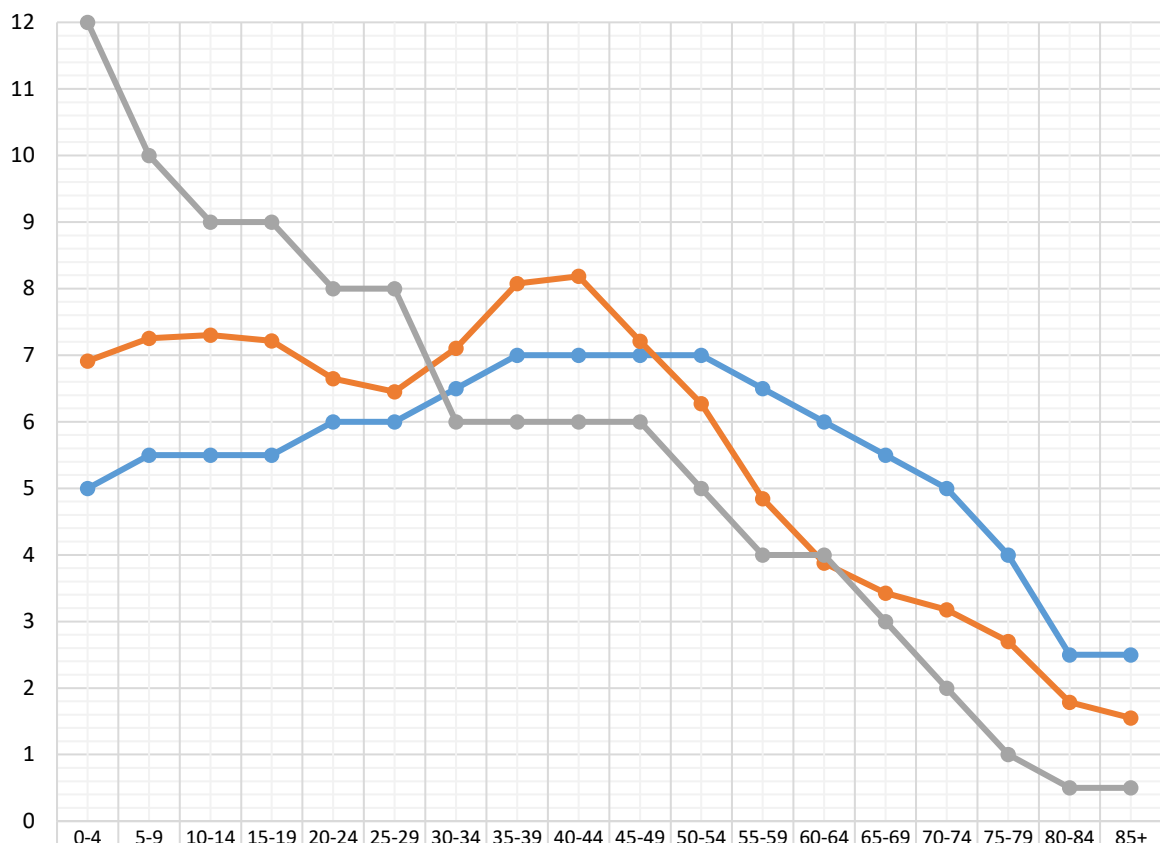

|                 | 0-4  | 5-9  | 10-14 | 15-19 | 20-24 | 25-29 | 30-34 | 35-39 | 40-44 | 45-49 | 50-54 | 55-59 | 60-64 | 65-69 | 70-74 | 75-79 | 80-84 | 85+ |
|-----------------|------|------|-------|-------|-------|-------|-------|-------|-------|-------|-------|-------|-------|-------|-------|-------|-------|-----|
| European (2013) | 5.0  | 5.5  | 5.5   | 5.5   | 6.0   | 6.0   | 6.5   | 7.0   | 7.0   | 7.0   | 7.0   | 6.5   | 6.0   | 5.5   | 5.0   | 4.0   | 2.5   | 2.5 |
| US (2000)       | 6.9  | 7.3  | 7.3   | 7.2   | 6.6   | 6.5   | 7.1   | 8.1   | 8.2   | 7.2   | 6.3   | 4.8   | 3.9   | 3.4   | 3.2   | 2.7   | 1.8   | 1.6 |
| World (2000)    | 12.0 | 10.0 | 9.0   | 9.0   | 8.0   | 8.0   | 6.0   | 6.0   | 6.0   | 6.0   | 5.0   | 4.0   | 4.0   | 3.0   | 2.0   | 1.0   | 0.5   | 0.5 |

5-year age-group and respective weights (percentages)

European (2013) US (2000) World (2000)

Supplementary Figure 1. Comparison of standard population weights – European (2013), United States (2000) and World (1960)

**Supplementary Table 5a. Age-Sex-Standardized Incidence Rates (ASR) per 100,000 for calendar years 1993 and 2017 separately and Average Annual Percentage Change (AAPC) for 188,340 individuals diagnosed with a primary CNS tumor according to behavior and anatomical location<sup>a</sup> and method of diagnosis – England, 1993-2017 - Malignant brain tumors, benign meningeal tumors and all other tumors combined**

| Characteristic                    | Method of Diagnosis | 1993 only |     |      |             | 2017 only |     |      |             | 1993-2017 |     |       |              |         |
|-----------------------------------|---------------------|-----------|-----|------|-------------|-----------|-----|------|-------------|-----------|-----|-------|--------------|---------|
|                                   |                     | n         | %   | ASR  | 95% CI      | n         | %   | ASR  | 95% CI      | n         | %   | AAPC  | 95% CI       | P-Value |
| <b>Malignant behavior - Brain</b> |                     |           |     |      |             |           |     |      |             |           |     |       |              |         |
| Pediatric (0-14)                  | All                 | 213       | 100 | 2.3  | (2.0,2.6)   | 254       | 100 | 2.5  | (2.2,2.8)   | 4,338     | 100 | -0.1  | (-0.5,0.3)   | 0.652   |
|                                   | MC                  | 176       | 83  | 1.9  | (1.6,2.2)   | 223       | 88  | 2.2  | (1.9,2.5)   | 3,607     | 83  | -0.3  | (-0.7,0.1)   | 0.178   |
|                                   | RC                  | 11        | 5   | 0.1  | (0.0,0.2)   | 27        | 11  | 0.3  | (0.2,0.4)   | 555       | 13  | 3.6*  | (2.1,5.2)    | < 0.001 |
|                                   | Other               | 26        | 12  | 0.3  | (0.2,0.4)   | 4         | 2   | 0.1  | (0.0,0.1)   | 176       | 4   | -6.5* | (-8.7,-4.3)  | < 0.001 |
| Teenagers & Young Adults (15-24)  | All                 | 113       | 100 | 1.8  | (1.5,2.1)   | 124       | 100 | 1.9  | (1.5,2.2)   | 2,408     | 100 | 0.1   | (-0.5,0.7)   | 0.825   |
|                                   | MC                  | 85        | 75  | 1.3  | (1.1,1.6)   | 114       | 92  | 1.7  | (1.4,2.0)   | 2,091     | 87  | 0.2   | (-0.3,0.8)   | 0.417   |
|                                   | RC                  | 2         | 2   | 0.0  | (0.0,0.1)   | 9         | 7   | 0.1  | (0.0,0.2)   | 178       | 7   | 2.3   | (-0.4,5.1)   | 0.094   |
|                                   | Other               | 26        | 23  | 0.4  | (0.3,0.6)   | 1         | 1   | 0.0  | (0.0,0.1)   | 139       | 6   | -6.0* | (-8.8,-3.1)  | < 0.001 |
| Adults (25-64)                    | All                 | 1,658     | 100 | 7.3  | (6.9,7.6)   | 1,887     | 100 | 6.7  | (6.4,7.0)   | 43,649    | 100 | -0.3  | (-1.4,0.7)   | 0.53    |
|                                   | MC                  | 1,238     | 75  | 5.4  | (5.1,5.7)   | 1,699     | 90  | 6.0  | (5.7,6.3)   | 37,453    | 86  | 0.4   | (-0.2,1.0)   | 0.153   |
|                                   | RC                  | 105       | 6   | 0.5  | (0.4,0.6)   | 175       | 9   | 0.6  | (0.5,0.7)   | 3,467     | 8   | 1.4*  | (0.5,2.4)    | 0.005   |
|                                   | Other               | 315       | 19  | 1.4  | (1.3,1.6)   | 13        | 1   | 0.1  | (0.0,0.1)   | 2,729     | 6   | -9.0* | (-10.1,-7.9) | < 0.001 |
| Older People (65-84)              | All                 | 1,125     | 100 | 16.4 | (15.4,17.4) | 1,928     | 100 | 22.3 | (21.3,23.3) | 37,721    | 100 | 1.4*  | (0.8,2.0)    | < 0.001 |
|                                   | MC                  | 477       | 42  | 6.9  | (6.3,7.5)   | 1,075     | 56  | 12.4 | (11.6,13.1) | 19,406    | 51  | 2.5*  | (1.9,3.2)    | < 0.001 |
|                                   | RC                  | 215       | 19  | 3.1  | (2.7,3.6)   | 791       | 41  | 9.2  | (8.5,9.8)   | 12,222    | 32  | 4.0*  | (3.0,5.1)    | < 0.001 |
|                                   | Other               | 433       | 38  | 6.4  | (5.8,7.0)   | 62        | 3   | 0.7  | (0.5,0.9)   | 6,093     | 16  | -9.5* | (-12.8,-6.1) | < 0.001 |
| Elderly (85+)                     | All                 | 54        | 100 | 6.2  | (4.5,7.8)   | 281       | 100 | 20.7 | (18.3,23.1) | 4,134     | 100 | 5.3*  | (3.9,6.7)    | < 0.001 |
|                                   | MC                  | 2         | 4   | 0.3  | (-0.1,0.7)  | 13        | 5   | 1.0  | (0.4,1.5)   | 203       | 5   | -0.5  | (-2.7,1.7)   | 0.636   |
|                                   | RC                  | 17        | 31  | 1.9  | (1.0,2.8)   | 250       | 89  | 18.4 | (16.1,20.7) | 2,802     | 68  | 9.5*  | (7.6,11.5)   | < 0.001 |
|                                   | Other               | 35        | 65  | 4.0  | (2.7,5.4)   | 18        | 6   | 1.3  | (0.7,2.0)   | 1,129     | 27  | -4.5* | (-8.2,-0.6)  | 0.025   |
| <b>Benign behavior - Meninges</b> |                     |           |     |      |             |           |     |      |             |           |     |       |              |         |
| Pediatric (0-14)                  | All                 | 2         | 100 | 0.1  | (0.0,0.2)   | 2         | 100 | 0.1  | (0.0,0.2)   | 83        | 100 | -0.7  | (-2.9,1.6)   | 0.534   |
|                                   | MC                  | 1         | 50  | 0.0  | (0.0,0.1)   | 1         | 50  | 0.0  | (0.0,0.1)   | 69        | 83  | -1.7  | (-4.1,0.7)   | 0.16    |
|                                   | RC                  | 0         | 0   | -    | -           | 1         | 50  | 0.0  | (0.0,0.1)   | 9         | 11  | -0.4  | (-1.2,0.4)   | 0.264   |
|                                   | Other               | 1         | 50  | 0.0  | (0.0,0.1)   | 0         | 0   | -    | -           | 5         | 6   | -0.1  | (-0.4,0.2)   | 0.446   |
| Teenagers & Young Adults (15-24)  | All                 | 12        | 100 | 0.2  | (0.1,0.3)   | 13        | 100 | 0.2  | (0.1,0.3)   | 271       | 100 | 0.5   | (-1.0,2.1)   | 0.479   |
|                                   | MC                  | 11        | 92  | 0.2  | (0.1,0.3)   | 10        | 77  | 0.1  | (0.1,0.2)   | 230       | 85  | -0.5  | (-2.2,1.3)   | 0.597   |
|                                   | RC                  | 0         | 0   | -    | -           | 3         | 23  | 0.0  | (0.0,0.1)   | 30        | 11  | 1.2   | (-3.1,5.7)   | 0.568   |
|                                   | Other               | 1         | 8   | 0.0  | (0.0,0.1)   | 0         | 0   | -    | -           | 11        | 4   | -0.4  | (-5.7,5.3)   | 0.878   |
| Adults (25-64)                    | All                 | 383       | 100 | 1.7  | (1.5,1.9)   | 1,148     | 100 | 4.1  | (3.9,4.3)   | 17,849    | 100 | 3.0*  | (0.8,5.3)    | 0.006   |
|                                   | MC                  | 327       | 85  | 1.5  | (1.3,1.6)   | 745       | 65  | 2.7  | (2.5,2.8)   | 14,583    | 82  | 2.1*  | (0.1,4.1)    | 0.039   |
|                                   | RC                  | 11        | 3   | 0.1  | (0.0,0.2)   | 389       | 34  | 1.4  | (1.3,1.5)   | 2,585     | 14  | 9.9*  | (7.7,12.1)   | < 0.001 |
|                                   | Other               | 45        | 12  | 0.2  | (0.1,0.3)   | 14        | 1   | 0.1  | (0.0,0.1)   | 681       | 4   | -5.7  | (-13.0,2.3)  | 0.16    |
| Older People (65-84)              | All                 | 329       | 100 | 4.8  | (4.3,5.3)   | 1,053     | 100 | 12.2 | (11.5,12.9) | 15,425    | 100 | 3.0*  | (0.8,5.3)    | 0.006   |
|                                   | MC                  | 217       | 66  | 3.2  | (2.7,3.6)   | 421       | 40  | 4.9  | (4.4,5.3)   | 7,925     | 51  | 1.5*  | (1.0,2.0)    | < 0.001 |
|                                   | RC                  | 29        | 9   | 0.4  | (0.3,0.6)   | 598       | 57  | 6.9  | (6.4,7.5)   | 5,609     | 36  | 9.0*  | (6.5,11.5)   | < 0.001 |
|                                   | Other               | 83        | 25  | 1.2  | (0.9,1.5)   | 34        | 3   | 0.4  | (0.3,0.5)   | 1,891     | 12  | -5.3* | (-9.7,-0.7)  | 0.025   |
| Elderly (85+)                     | All                 | 45        | 100 | 5.6  | (3.9,7.2)   | 251       | 100 | 18.6 | (16.3,20.9) | 4,178     | 100 | 4.8*  | (3.4,6.2)    | < 0.001 |
|                                   | MC                  | 12        | 27  | 1.5  | (0.6,2.3)   | 15        | 6   | 1.1  | (0.5,1.7)   | 387       | 9   | 0.3   | (-1.2,1.8)   | 0.728   |
|                                   | RC                  | 7         | 16  | 0.8  | (0.2,1.4)   | 218       | 87  | 16.1 | (14.0,18.2) | 2,703     | 65  | 9.3*  | (7.7,10.8)   | < 0.001 |
|                                   | Other               | 26        | 58  | 3.3  | (2.0,4.6)   | 18        | 7   | 1.4  | (0.7,2.0)   | 1,088     | 26  | -4.6  | (-9.1,0.1)   | 0.057   |
| <b>All Other CNS Tumors</b>       |                     |           |     |      |             |           |     |      |             |           |     |       |              |         |
| Pediatric (0-14)                  | All                 | 100       | 100 | 1.1  | (0.9,1.3)   | 166       | 100 | 1.7  | (1.4,1.9)   | 4,780     | 100 | 1.9*  | (1.4,2.4)    | < 0.001 |
|                                   | MC                  | 75        | 75  | 0.8  | (0.6,1.0)   | 117       | 70  | 1.2  | (1.0,1.4)   | 3,924     | 82  | 1.6*  | (1.0,2.3)    | < 0.001 |
|                                   | RC                  | 7         | 7   | 0.1  | (0.0,0.1)   | 41        | 25  | 0.4  | (0.3,0.5)   | 633       | 13  | 6.8*  | (3.7,9.9)    | < 0.001 |
|                                   | Other               | 18        | 18  | 0.2  | (0.1,0.3)   | 8         | 5   | 0.1  | (0.0,0.1)   | 223       | 5   | -3.6* | (-5.6,-1.6)  | 0.001   |
| Teenagers & Young Adults (15-24)  | All                 | 68        | 100 | 1.1  | (0.8,1.3)   | 161       | 100 | 2.4  | (2.0,2.8)   | 3,246     | 100 | 2.4*  | (1.7,3.0)    | < 0.001 |
|                                   | MC                  | 44        | 65  | 0.7  | (0.5,0.9)   | 111       | 69  | 1.7  | (1.4,2.0)   | 2,569     | 79  | 2.1*  | (1.3,2.9)    | < 0.001 |
|                                   | RC                  | 2         | 3   | 0.0  | (0.0,0.1)   | 47        | 29  | 0.7  | (0.5,0.9)   | 434       | 13  | 7.7*  | (5.7,9.6)    | < 0.001 |
|                                   | Other               | 22        | 32  | 0.3  | (0.2,0.5)   | 3         | 2   | 0.0  | (0.0,0.1)   | 243       | 7   | -3.2* | (-5.6,-0.8)  | 0.012   |
| Adults (25-64)                    | All                 | 895       | 100 | 3.8  | (3.6,4.1)   | 1,653     | 100 | 5.8  | (5.5,6.1)   | 30,694    | 100 | 1.8   | (-0.1,3.8)   | 0.069   |
|                                   | MC                  | 682       | 76  | 2.9  | (2.7,3.1)   | 1,154     | 70  | 4.0  | (3.8,4.3)   | 23,560    | 77  | 1.5*  | (1.1,2.0)    | < 0.001 |
|                                   | RC                  | 51        | 6   | 0.2  | (0.2,0.3)   | 461       | 28  | 1.6  | (1.5,1.8)   | 4,478     | 15  | 8.6*  | (5.4,11.8)   | < 0.001 |
|                                   | Other               | 162       | 18  | 0.7  | (0.6,0.8)   | 38        | 2   | 0.1  | (0.1,0.2)   | 2,656     | 9   | -4.3* | (-6.0,-2.5)  | < 0.001 |
| Older People (65-84)              | All                 | 529       | 100 | 7.7  | (7.1,8.4)   | 802       | 100 | 9.2  | (8.6,9.9)   | 16,796    | 100 | 1.4*  | (1.0,1.7)    | < 0.001 |
|                                   | MC                  | 215       | 41  | 3.1  | (2.7,3.5)   | 415       | 52  | 4.8  | (4.3,5.2)   | 7,921     | 47  | 2.5*  | (0.4,4.6)    | 0.018   |
|                                   | RC                  | 87        | 16  | 1.3  | (1.0,1.5)   | 359       | 45  | 4.1  | (3.7,4.6)   | 5,012     | 30  | 4.5*  | (3.8,5.2)    | < 0.001 |
|                                   | Other               | 227       | 43  | 3.3  | (2.9,3.7)   | 28        | 3   | 0.3  | (0.2,0.4)   | 3,863     | 23  | -9.2* | (-12.8,-5.6) | < 0.001 |
| Elderly (85+)                     | All                 | 45        | 100 | 5.4  | (3.8,7.0)   | 112       | 100 | 8.2  | (6.7,9.8)   | 2,768     | 100 | 0.6   | (-0.9,2.0)   | 0.45    |
|                                   | MC                  | 7         | 16  | 0.9  | (0.2,1.5)   | 11        | 10  | 0.8  | (0.3,1.2)   | 262       | 9   | 0.4   | (-1.8,2.7)   | 0.69    |
|                                   | RC                  | 14        | 31  | 1.6  | (0.8,2.5)   | 95        | 85  | 7.0  | (5.6,8.4)   | 1,340     | 48  | 7.1*  | (5.0,9.2)    | < 0.001 |
|                                   | Other               | 24        | 53  | 2.9  | (1.7,4.1)   | 6         | 5   | 0.5  | (0.1,0.8)   | 1,166     | 42  | -8.0* | (-12.4,-3.4) | 0.001   |

**Abbreviations:** MC, microscopically confirmed; RC, radiographically confirmed; CNS, central nervous system.

\*Indicates a statistically significant departure ( $p < 0.05$ ) from a slope of 0.

<sup>a</sup>Anatomical location based on the ICD-10 topography codes.

**Supplementary Table 5b. Age-Sex-Standardized Incidence Rates (ASR) per 100,000 for calendar years 1993 and 2017 separately and Average Annual Percentage Change (AAPC) for 188,340 individuals diagnosed with a primary CNS tumor according to behavior, anatomical location<sup>a</sup> and method of diagnosis – England, 1993-2017 - Malignant tumors only**

| Characteristic                                          | Method of Diagnosis | 1993 only |     |      |             | 2017 only |     |      |             | 1993-2017 |     |       |              |         |
|---------------------------------------------------------|---------------------|-----------|-----|------|-------------|-----------|-----|------|-------------|-----------|-----|-------|--------------|---------|
|                                                         |                     | n         | %   | ASR  | 95% CI      | n         | %   | ASR  | 95% CI      | n         | %   | AAPC  | 95% CI       | P-Value |
| <b>Malignant behavior - Meninges</b>                    |                     |           |     |      |             |           |     |      |             |           |     |       |              |         |
| Pediatric (0-14)                                        | All                 | 3         | 100 | 0.0  | (0,0,0.1)   | 1         | 100 | 0.0  | (0,0,0.1)   | 34        | 100 | -0.5  | (-1.9,1.0)   | 0.482   |
|                                                         | MC                  | 3         | 100 | 0.0  | (0,0,0.1)   | 1         | 100 | 0.0  | (0,0,0.1)   | 33        | 97  | -0.8  | (-2.0,0.4)   | 0.157   |
|                                                         | RC                  | –         | –   | –    | –           | –         | –   | –    | –           | 1         | 3   | –     | –            | –       |
|                                                         | Other               | –         | –   | –    | –           | –         | –   | –    | –           | –         | –   | –     | –            | –       |
| Teenagers & Young Adults (15-24)                        | All                 | 1         | 100 | 0.0  | (0,0,0.1)   | 1         | 100 | 0.0  | (0,0,0.1)   | 23        | 100 | -0.7  | (-3.4,2.0)   | 0.57    |
|                                                         | MC                  | –         | –   | –    | –           | 1         | 100 | 0.0  | (0,0,0.1)   | 20        | 87  | 0.1   | (-2.8,3.0)   | 0.967   |
|                                                         | RC                  | –         | –   | –    | –           | –         | –   | –    | –           | 2         | 9   | -1.4  | –            | –       |
|                                                         | Other               | 1         | 100 | 0.0  | (0,0,0.1)   | –         | –   | –    | –           | 1         | 4   | –     | –            | –       |
| Adults (25-64)                                          | All                 | 58        | 100 | 0.3  | (0.2,0.4)   | 25        | 100 | 0.1  | (0.1,0.2)   | 737       | 100 | 0.0   | (-1.4,1.5)   | 0.959   |
|                                                         | MC                  | 46        | 79  | 0.2  | (0.2,0.3)   | 25        | 100 | 0.1  | (0.1,0.2)   | 639       | 87  | 0.4   | (-0.9,1.7)   | 0.572   |
|                                                         | RC                  | 6         | 10  | 0.1  | (0.0,0.1)   | –         | –   | –    | –           | 42        | 6   | -1.7  | (-3.5,0.2)   | 0.07    |
|                                                         | Other               | 6         | 10  | 0.1  | (0.0,0.1)   | –         | –   | –    | –           | 56        | 8   | 2.0   | (-2.8,7.0)   | 0.427   |
| Older People (65-84)                                    | All                 | 54        | 100 | 0.8  | (0.6,1.0)   | 16        | 100 | 0.2  | (0.1,0.3)   | 764       | 100 | -4.1  | (-8.1,0.0)   | 0.053   |
|                                                         | MC                  | 29        | 54  | 0.4  | (0.3,0.6)   | 15        | 94  | 0.2  | (0.1,0.3)   | 416       | 54  | -0.4  | (-1.9,1.2)   | 0.625   |
|                                                         | RC                  | 13        | 24  | 0.2  | (0.1,0.3)   | 1         | 6   | 0.1  | (-0.1,0.2)  | 195       | 26  | 1.3   | (-1.4,4.1)   | 0.347   |
|                                                         | Other               | 12        | 22  | 0.2  | (0.1,0.3)   | –         | –   | –    | –           | 153       | 20  | -3.5* | (-6.7,-0.2)  | 0.04    |
| Elderly (85+)                                           | All                 | 2         | 100 | 0.4  | (-0.1,0.8)  | 1         | 100 | 0.2  | (-0.2,0.6)  | 179       | 100 | -7.9  | (-15.9,1.0)  | 0.079   |
|                                                         | MC                  | –         | –   | –    | –           | 1         | 100 | 0.2  | (-0.2,0.6)  | 21        | 12  | -2.9* | (-5.4,-0.2)  | 0.035   |
|                                                         | RC                  | 1         | 50  | 0.2  | (-0.2,0.5)  | –         | –   | –    | –           | 92        | 51  | 2.4   | (-2.4,7.5)   | 0.31    |
|                                                         | Other               | 1         | 50  | 0.2  | (-0.2,0.5)  | –         | –   | –    | –           | 66        | 37  | 0.8   | (-2.7,4.5)   | 0.632   |
| <b>Malignant behavior - Brain</b>                       |                     |           |     |      |             |           |     |      |             |           |     |       |              |         |
| Pediatric (0-14)                                        | All                 | 213       | 100 | 2.3  | (2.0,2.6)   | 254       | 100 | 2.5  | (2.2,2.8)   | 4,338     | 100 | -0.1  | (-0.5,0.3)   | 0.652   |
|                                                         | MC                  | 176       | 83  | 1.9  | (1.6,2.2)   | 223       | 88  | 2.2  | (1.9,2.5)   | 3,607     | 83  | -0.3  | (-0.7,0.1)   | 0.178   |
|                                                         | RC                  | 11        | 5   | 0.1  | (0.0,0.2)   | 27        | 11  | 0.3  | (0.2,0.4)   | 555       | 13  | 3.6*  | (2.1,5.2)    | <0.001  |
|                                                         | Other               | 26        | 12  | 0.3  | (0.2,0.4)   | 4         | 2   | 0.1  | (0.0,0.1)   | 176       | 4   | -6.5* | (-8.7,-4.3)  | <0.001  |
| Teenagers & Young Adults (15-24)                        | All                 | 113       | 100 | 1.8  | (1.5,2.1)   | 124       | 100 | 1.9  | (1.5,2.2)   | 2,408     | 100 | 0.1   | (-0.5,0.7)   | 0.825   |
|                                                         | MC                  | 85        | 75  | 1.3  | (1.1,1.6)   | 114       | 92  | 1.7  | (1.4,2.0)   | 2,091     | 87  | 0.2   | (-0.3,0.8)   | 0.417   |
|                                                         | RC                  | 2         | 2   | 0.0  | (0.0,0.1)   | 9         | 7   | 0.1  | (0.0,0.2)   | 178       | 7   | 2.3   | (-0.4,5.1)   | 0.094   |
|                                                         | Other               | 26        | 23  | 0.4  | (0.3,0.6)   | 1         | 1   | 0.0  | (0.0,0.1)   | 139       | 6   | -6.0* | (-8.8,-3.1)  | <0.001  |
| Adults (25-64)                                          | All                 | 1,658     | 100 | 7.3  | (6.9,7.6)   | 1,887     | 100 | 6.7  | (6.4,7.0)   | 43,649    | 100 | -0.3  | (-1.4,0.7)   | 0.53    |
|                                                         | MC                  | 1,238     | 75  | 5.4  | (5.1,5.7)   | 1,699     | 90  | 6.0  | (5.7,6.3)   | 37,453    | 86  | 0.4   | (-0.2,1.0)   | 0.153   |
|                                                         | RC                  | 105       | 6   | 0.5  | (0.4,0.6)   | 175       | 9   | 0.6  | (0.5,0.7)   | 3,467     | 8   | 1.4*  | (0.5,2.4)    | 0.005   |
|                                                         | Other               | 315       | 19  | 1.4  | (1.3,1.6)   | 13        | 1   | 0.1  | (0.0,0.1)   | 2,729     | 6   | -9.0* | (-10.1,-7.9) | <0.001  |
| Older People (65-84)                                    | All                 | 1,125     | 100 | 16.4 | (15.4,17.4) | 1,928     | 100 | 22.3 | (21.3,23.3) | 37,721    | 100 | 1.4*  | (0.8,2.0)    | <0.001  |
|                                                         | MC                  | 477       | 42  | 6.9  | (6.3,7.5)   | 1,075     | 56  | 12.4 | (11.6,13.1) | 19,406    | 51  | 2.5*  | (1.9,3.2)    | <0.001  |
|                                                         | RC                  | 215       | 19  | 3.1  | (2.7,3.6)   | 791       | 41  | 9.2  | (8.5,9.8)   | 12,222    | 32  | 4.0*  | (3.0,5.1)    | <0.001  |
|                                                         | Other               | 433       | 38  | 6.4  | (5.8,7.0)   | 62        | 3   | 0.7  | (0.5,0.9)   | 6,093     | 16  | -9.5* | (-12.8,-6.1) | <0.001  |
| Elderly (85+)                                           | All                 | 54        | 100 | 6.2  | (4.5,7.8)   | 281       | 100 | 20.7 | (18.3,23.1) | 4,134     | 100 | 5.3*  | (3.9,6.7)    | <0.001  |
|                                                         | MC                  | 2         | 4   | 0.3  | (-0.1,0.7)  | 13        | 5   | 1.0  | (0.4,1.5)   | 203       | 5   | -0.5  | (-2.7,1.7)   | 0.636   |
|                                                         | RC                  | 17        | 31  | 1.9  | (1.0,2.8)   | 250       | 89  | 18.4 | (16.1,20.7) | 2,802     | 68  | 9.5*  | (7.6,11.5)   | <0.001  |
|                                                         | Other               | 35        | 65  | 4.0  | (2.7,5.4)   | 18        | 6   | 1.3  | (0.7,2.0)   | 1,129     | 27  | -4.5* | (-8.2,-0.6)  | 0.025   |
| <b>Malignant behavior - Spinal Cord &amp; Other CNS</b> |                     |           |     |      |             |           |     |      |             |           |     |       |              |         |
| Pediatric (0-14)                                        | All                 | 34        | 100 | 0.4  | (0.2,0.5)   | 40        | 100 | 0.4  | (0.3,0.5)   | 700       | 100 | 0.8   | (-0.3,1.9)   | 0.132   |
|                                                         | MC                  | 27        | 79  | 0.3  | (0.2,0.4)   | 24        | 60  | 0.2  | (0.1,0.3)   | 340       | 49  | -1.3  | (-3.0,0.3)   | 0.109   |
|                                                         | RC                  | 3         | 9   | 0.0  | (0.0,0.1)   | 14        | 35  | 0.1  | (0.1,0.2)   | 305       | 44  | 4.5*  | (0.5,8.6)    | 0.027   |
|                                                         | Other               | 4         | 12  | 0.1  | (0.0,0.1)   | 2         | 5   | 0.1  | (0.0,0.1)   | 55        | 8   | -2.6  | (-5.8,0.8)   | 0.123   |
| Teenagers & Young Adults (15-24)                        | All                 | 9         | 100 | 0.1  | (0.0,0.2)   | 11        | 100 | 0.2  | (0.1,0.3)   | 171       | 100 | 0.0   | (-2.1,2.1)   | 0.971   |
|                                                         | MC                  | 7         | 78  | 0.1  | (0.0,0.2)   | 9         | 82  | 0.1  | (0.0,0.2)   | 141       | 82  | -0.3  | (-2.6,2.0)   | 0.773   |
|                                                         | RC                  | –         | –   | –    | –           | 1         | 9   | 0.0  | (0.0,0.1)   | 20        | 12  | 0.3   | (-2.7,3.4)   | 0.834   |
|                                                         | Other               | 2         | 22  | 0.1  | (0.0,0.2)   | 1         | 9   | 0.0  | (0.0,0.1)   | 10        | 6   | -2.9* | (-5.4,-0.4)  | 0.031   |
| Adults (25-64)                                          | All                 | 76        | 100 | 0.3  | (0.2,0.4)   | 65        | 100 | 0.2  | (0.2,0.3)   | 1,379     | 100 | 0.2   | (-2.4,2.8)   | 0.894   |
|                                                         | MC                  | 61        | 80  | 0.2  | (0.2,0.3)   | 52        | 80  | 0.2  | (0.1,0.2)   | 1,179     | 86  | 0.0   | (-2.7,2.8)   | 0.988   |
|                                                         | RC                  | 2         | 3   | 0.0  | (0.0,0.1)   | 9         | 14  | 0.1  | (0.0,0.1)   | 89        | 6   | 2.3*  | (0.6,4.0)    | 0.009   |
|                                                         | Other               | 13        | 17  | 0.1  | (0.0,0.1)   | 4         | 6   | 0.0  | (0.0,0.1)   | 111       | 8   | -2.3* | (-4.0,-0.7)  | 0.008   |
| Older People (65-84)                                    | All                 | 35        | 100 | 0.5  | (0.3,0.7)   | 16        | 100 | 0.2  | (0.1,0.3)   | 496       | 100 | 0.1   | (-1.0,1.3)   | 0.795   |
|                                                         | MC                  | 19        | 54  | 0.3  | (0.2,0.5)   | 11        | 69  | 0.1  | (0.1,0.2)   | 272       | 55  | 0.7   | (-0.9,2.2)   | 0.385   |
|                                                         | RC                  | 9         | 26  | 0.1  | (0.0,0.2)   | 5         | 31  | 0.1  | (0.0,0.2)   | 121       | 24  | 1.9   | (-0.4,4.2)   | 0.1     |
|                                                         | Other               | 7         | 20  | 0.1  | (0.0,0.2)   | –         | –   | –    | –           | 103       | 21  | -3.2* | (-5.1,-1.2)  | 0.003   |
| Elderly (85+)                                           | All                 | –         | –   | –    | –           | 1         | 100 | 0.1  | (-0.1,0.3)  | 49        | 100 | -4.1  | (-10.1,2.4)  | 0.213   |
|                                                         | MC                  | –         | –   | –    | –           | –         | –   | –    | –           | 16        | 33  | -0.7  | (-5.4,4.2)   | 0.744   |
|                                                         | RC                  | –         | –   | –    | –           | 1         | 100 | 0.1  | (-0.1,0.3)  | 17        | 35  | -2.6  | (-9.4,4.6)   | 0.414   |
|                                                         | Other               | –         | –   | –    | –           | –         | –   | –    | –           | 16        | 33  | -3.2* | (-5.5,-0.9)  | 0.012   |
| <b>Malignant behavior - Endocrine CNS</b>               |                     |           |     |      |             |           |     |      |             |           |     |       |              |         |
| Pediatric (0-14)                                        | All                 | 7         | 100 | 0.2  | (0.1,0.4)   | 10        | 100 | 0.2  | (0.1,0.2)   | 272       | 100 | 0.3   | (-1.0,1.7)   | 0.612   |
|                                                         | MC                  | 7         | 100 | 0.2  | (0.1,0.4)   | 10        | 100 | 0.2  | (0.1,0.2)   | 240       | 88  | -0.1  | (-1.7,1.5)   | 0.915   |
|                                                         | RC                  | –         | –   | –    | –           | –         | –   | –    | –           | 19        | 7   | 2.8   | (-1.0,6.7)   | 0.132   |
|                                                         | Other               | –         | –   | –    | –           | –         | –   | –    | –           | 13        | 5   | 1.8   | (-1.5,5.2)   | 0.25    |
| Teenagers & Young Adults (15-24)                        | All                 | 12        | 100 | 0.2  | (0.1,0.3)   | 11        | 100 | 0.2  | (0.1,0.3)   | 253       | 100 | 0.6   | (-1.2,2.5)   | 0.489   |
|                                                         | MC                  | 6         | 50  | 0.1  | (0.0,0.2)   | 8         | 73  | 0.1  | (0.0,0.2)   | 209       | 83  | 0.7   | (-1.4,2.9)   | 0.482   |
|                                                         | RC                  | 1         | 8   | 0.0  | (0.0,0.1)   | 3         | 27  | 0.0  | (0.0,0.1)   | 21        | 8   | 0.8   | (-1.9,3.5)   | 0.536   |
|                                                         | Other               | 5         | 42  | 0.1  | (0.0,0.2)   | –         | –   | –    | –           | 23        | 9   | -1.0  | (-2.8,0.8)   | 0.241   |
| Adults (25-64)                                          | All                 | 64        | 100 | 0.3  | (0.2,0.3)   | 17        | 100 | 0.1  | (0.0,0.1)   | 402       | 100 | -0.3  | (-1.4,0.8)   | 0.585   |
|                                                         | MC                  | 46        | 72  | 0.2  | (0.1,0.3)   | 12        | 71  | 0.0  | (0.0,0.1)   | 280       | 70  | -0.2  | (-1.2,0.9)   | 0.765   |
|                                                         | RC                  | 4         | 6   | 0.0  | (0.0,0.1)   | 3         | 18  | 0.0  | (0.0,0.1)   | 50        | 12  | 0.4   | (-1.6,2.4)   | 0.699   |
|                                                         | Other               | 14        | 22  | 0.1  | (0.0,0.2)   | 2         | 12  | 0.0  | (0.0,0.1)   | 72        | 18  | -1.9* | (-3.7,-0.1)  | 0.043   |
| Older People (65-84)                                    | All                 | 27        | 100 | 0.4  | (0.2,0.5)   | 10        | 100 | 0.1  | (0.0,0.2)   | 261       | 100 | -1.4  | (-3.1,0.4)   | 0.115   |
|                                                         | MC                  | 16        | 59  | 0.4  | (0.2,0.6)   | 7         | 70  | 0.1  | (0.0,0.2)   | 111       | 43  | 0.9   | (-1.6,3.4)   | 0.473   |
|                                                         | RC                  | 3         | 11  | 0.1  | (0.0,0.1)   | 2         | 20  | 0.0  | (0.0,0.1)   | 59        | 23  | -0.1  | (-1.9,1.6)   | 0.865   |
|                                                         | Other               | 8         | 30  | 0.1  | (0.0,0.2)   | 1         | 10  | 0.1  | (-0.1,0.2)  | 91        | 35  | -0.5  | (-2.6,1.7)   | 0.637   |
| Elderly (85+)                                           | All                 | 2         | 100 | 0.3  | (-0.1,0.7)  | –         | –   | –    | –           | 61        | 100 | 0.0   | (-3.0,3.0)   | 0.975   |
|                                                         | MC                  | –         | –   | –    | –           | –         | –   | –    | –           | 7         | 11  | -1.9* | (-3.8,0.0)   | 0.05    |
|                                                         | RC                  | 2         | 100 | 0.3  | (-0.1,0.7)  | –         | –   | –    | –           | 23        | 38  | -1.9  | (-4.0,0.3)   | 0.082   |
|                                                         | Other               | –         | –   | –    | –           | –         | –   | –    | –           | 31        | 51  | -2.7  | (-6.0,0.8)   | 0.123   |

**Abbreviations:** MC, microscopically confirmed; RC, radiographically confirmed; CNS, central nervous system.

<sup>a</sup>Anatomical location based on the ICD-10 topography codes.

\*Indicates a statistically significant departure (p<0.05) from a slope of 0.

**Supplementary Table 5c. Age-Sex-Standardized Incidence Rates (ASR) per 100,000 for calendar years 1993 and 2017 separately and Average Annual Percentage Change (AAPC) for 188,340 individuals diagnosed with a primary CNS tumor according to behavior, anatomical location<sup>a</sup> and method of diagnosis – England, 1993-2017 - Benign tumors only**

| Characteristic                                       | Method of Diagnosis | 1993 only |     |     |            | 2017 only |     |      |             | 1993-2017 |     |       |              |         |
|------------------------------------------------------|---------------------|-----------|-----|-----|------------|-----------|-----|------|-------------|-----------|-----|-------|--------------|---------|
|                                                      |                     | n         | %   | ASR | 95% CI     | n         | %   | ASR  | 95% CI      | n         | %   | AAPC  | 95% CI       | P-Value |
| <b>Benign behavior - Meninges</b>                    |                     |           |     |     |            |           |     |      |             |           |     |       |              |         |
| Pediatric (0-14)                                     | All                 | 2         | 100 | 0.1 | (0,0,0.2)  | 2         | 100 | 0.1  | (0,0,0.2)   | 83        | 100 | -0.7  | (-2.9,1.6)   | 0.534   |
|                                                      | MC                  | 1         | 50  | 0.0 | (0,0,0.1)  | 1         | 50  | 0.0  | (0,0,0.1)   | 69        | 83  | -1.7  | (-4.1,0.7)   | 0.16    |
|                                                      | RC                  | -         | -   | -   | -          | 1         | 50  | 0.0  | (0,0,0.1)   | 9         | 11  | -0.4  | (-1.2,0.4)   | 0.264   |
|                                                      | Other               | 1         | 50  | 0.0 | (0,0,0.1)  | -         | -   | -    | -           | 5         | 6   | -0.1  | (-0.4,0.2)   | 0.446   |
| Teenagers & Young Adults (15-24)                     | All                 | 12        | 100 | 0.2 | (0,1,0.3)  | 13        | 100 | 0.2  | (0,1,0.3)   | 271       | 100 | 0.5   | (-1.0,2.1)   | 0.479   |
|                                                      | MC                  | 11        | 92  | 0.2 | (0,1,0.3)  | 10        | 77  | 0.1  | (0,1,0.2)   | 230       | 85  | -0.5  | (-2.2,1.3)   | 0.597   |
|                                                      | RC                  | -         | -   | -   | -          | 3         | 23  | 0.0  | (0,0,0.1)   | 30        | 11  | 1.2   | (-3.1,5.7)   | 0.568   |
|                                                      | Other               | 1         | 8   | 0.0 | (0,0,0.1)  | -         | -   | -    | -           | 11        | 4   | -0.4  | (-5.7,5.3)   | 0.878   |
| Adults (25-64)                                       | All                 | 383       | 100 | 1.7 | (1.5,1.9)  | 1,148     | 100 | 4.1  | (3.9,4.3)   | 17,849    | 100 | 3.0*  | (0.8,5.3)    | 0.006   |
|                                                      | MC                  | 327       | 85  | 1.5 | (1.3,1.6)  | 745       | 65  | 2.7  | (2.5,2.8)   | 14,583    | 82  | 2.1*  | (0.1,4.1)    | 0.039   |
|                                                      | RC                  | 11        | 3   | 0.1 | (0,0,0.2)  | 389       | 34  | 1.4  | (1.3,1.5)   | 2,585     | 14  | 9.9*  | (7.7,12.1)   | < 0.001 |
|                                                      | Other               | 45        | 12  | 0.2 | (0,1,0.3)  | 14        | 1   | 0.1  | (0,0,0.1)   | 681       | 4   | -5.7  | (-13.0,2.3)  | 0.16    |
| Older People (65-84)                                 | All                 | 329       | 100 | 4.8 | (4.3,5.3)  | 1,053     | 100 | 12.2 | (11.5,12.9) | 15,425    | 100 | 3.0*  | (0.8,5.3)    | 0.006   |
|                                                      | MC                  | 217       | 66  | 3.2 | (2.7,3.6)  | 421       | 40  | 4.9  | (4.4,5.3)   | 7,925     | 51  | 1.5*  | (-1.0,2.0)   | < 0.001 |
|                                                      | RC                  | 29        | 9   | 0.4 | (0,3,0.6)  | 598       | 57  | 6.9  | (6.4,7.5)   | 5,609     | 36  | 9.0*  | (6.5,11.5)   | < 0.001 |
|                                                      | Other               | 83        | 25  | 1.2 | (0.9,1.5)  | 34        | 3   | 0.4  | (0,3,0.5)   | 1,891     | 12  | -5.3* | (-9.7,-0.7)  | 0.025   |
| Elderly (85+)                                        | All                 | 45        | 100 | 5.6 | (3.9,7.2)  | 251       | 100 | 18.6 | (16.3,20.9) | 4,178     | 100 | 4.8*  | (3.4,6.2)    | < 0.001 |
|                                                      | MC                  | 12        | 27  | 1.5 | (0.6,2.3)  | 15        | 6   | 1.1  | (0.5,1.7)   | 387       | 9   | 0.3   | (-1.2,1.8)   | 0.728   |
|                                                      | RC                  | 7         | 16  | 0.8 | (0.2,1.4)  | 218       | 87  | 16.1 | (14.0,18.2) | 2,703     | 65  | 9.3*  | (7.7,10.8)   | < 0.001 |
|                                                      | Other               | 26        | 58  | 3.3 | (2.0,4.6)  | 18        | 7   | 1.4  | (0.7,2.0)   | 1,088     | 26  | -4.6  | (-9.1,0.1)   | 0.057   |
| <b>Benign behavior - Brain</b>                       |                     |           |     |     |            |           |     |      |             |           |     |       |              |         |
| Pediatric (0-14)                                     | All                 | 9         | 100 | 0.1 | (0,0,0.2)  | 15        | 100 | 0.2  | (0,1,0.2)   | 443       | 100 | 1.6   | (-0.7,4.0)   | 0.164   |
|                                                      | MC                  | 8         | 89  | 0.1 | (0,0,0.1)  | 11        | 73  | 0.1  | (0,0,0.2)   | 382       | 86  | 1.1   | (-1.3,3.6)   | 0.345   |
|                                                      | RC                  | -         | -   | -   | -          | 4         | 27  | 0.1  | (0,0,0.1)   | 41        | 9   | 0.6   | (-2.9,4.3)   | 0.707   |
|                                                      | Other               | 1         | 11  | 0.0 | (0,0,0.1)  | -         | -   | -    | -           | 20        | 5   | -1.0  | (-3.0,1.1)   | 0.308   |
| Teenagers & Young Adults (15-24)                     | All                 | 4         | 100 | 0.1 | (0,0,0.2)  | 17        | 100 | 0.3  | (0,1,0.4)   | 276       | 100 | 4.0*  | (2.2,5.8)    | < 0.001 |
|                                                      | MC                  | 3         | 75  | 0.1 | (0,0,0.2)  | 10        | 59  | 0.1  | (0,1,0.2)   | 214       | 78  | 3.0*  | (0.8,5.2)    | 0.009   |
|                                                      | RC                  | -         | -   | -   | -          | 7         | 41  | 0.1  | (0,0,0.2)   | 40        | 14  | 2.4   | (-2.1,7.2)   | 0.275   |
|                                                      | Other               | 1         | 25  | 0.0 | (0,0,0.1)  | -         | -   | -    | -           | 22        | 8   | -0.2  | (-2.7,2.4)   | 0.869   |
| Adults (25-64)                                       | All                 | 35        | 100 | 0.1 | (0,1,0.2)  | 116       | 100 | 0.4  | (0,3,0.5)   | 1,411     | 100 | 5.5*  | (3.8,7.3)    | < 0.001 |
|                                                      | MC                  | 31        | 89  | 0.1 | (0,1,0.2)  | 68        | 59  | 0.2  | (0,2,0.3)   | 1,053     | 75  | 4.0*  | (1.9,6.1)    | 0.001   |
|                                                      | RC                  | -         | -   | -   | -          | 44        | 38  | 0.2  | (0,1,0.2)   | 240       | 17  | 6.2*  | (0.4,12.3)   | 0.037   |
|                                                      | Other               | 4         | 11  | 0.0 | (0,0,0.1)  | 4         | 3   | 0.0  | (0,0,0.1)   | 118       | 8   | -0.6  | (-1.9,0.7)   | 0.38    |
| Older People (65-84)                                 | All                 | 22        | 100 | 0.3 | (0,2,0.4)  | 34        | 100 | 0.4  | (0,3,0.5)   | 511       | 100 | 3.5*  | (1.5,5.6)    | 0.002   |
|                                                      | MC                  | 11        | 50  | 0.2 | (0,1,0.3)  | 7         | 21  | 0.1  | (0,0,0.1)   | 187       | 37  | -4.3  | (-17.8,11.4) | 0.573   |
|                                                      | RC                  | -         | -   | -   | -          | 27        | 79  | 0.3  | (0,2,0.4)   | 192       | 38  | 6.6*  | (4.3,9.0)    | < 0.001 |
|                                                      | Other               | 11        | 50  | 0.2 | (0,1,0.2)  | -         | -   | -    | -           | 132       | 26  | -3.2* | (-5.6,-0.7)  | 0.015   |
| Elderly (85+)                                        | All                 | 2         | 100 | 0.3 | (-0.1,0.7) | 5         | 100 | 0.4  | (0,0,0.7)   | 95        | 100 | 1.3   | (-0.8,3.4)   | 0.217   |
|                                                      | MC                  | 1         | 50  | 0.2 | (-0.2,0.5) | -         | -   | -    | -           | 6         | 6   | -1.8* | (-2.5,-1.2)  | 0.001   |
|                                                      | RC                  | -         | -   | -   | -          | 4         | 80  | 0.5  | (0,0,0.9)   | 46        | 48  | 6.3   | (-6.5,20.8)  | 0.352   |
|                                                      | Other               | 1         | 50  | 0.4 | (-0.4,1.2) | 1         | 20  | 0.2  | (-0.2,0.6)  | 43        | 45  | -2.0  | (-4.6,0.8)   | 0.148   |
| <b>Benign behavior - Spinal Cord &amp; Other CNS</b> |                     |           |     |     |            |           |     |      |             |           |     |       |              |         |
| Pediatric (0-14)                                     | All                 | -         | -   | -   | -          | 16        | 100 | 0.2  | (0,1,0.2)   | 136       | 100 | 4.1*  | (1.6,6.8)    | 0.003   |
|                                                      | MC                  | -         | -   | -   | -          | 11        | 69  | 0.1  | (0,0,0.2)   | 107       | 79  | 3.4*  | (1.1,5.8)    | 0.006   |
|                                                      | RC                  | -         | -   | -   | -          | 4         | 25  | 0.1  | (0,0,0.1)   | 15        | 11  | 1.3   | (-3.5,6.4)   | 0.548   |
|                                                      | Other               | -         | -   | -   | -          | 1         | 6   | 0.0  | (0,0,0.1)   | 14        | 10  | 0.7   | (-0.9,2.4)   | 0.35    |
| Teenagers & Young Adults (15-24)                     | All                 | 10        | 100 | 0.3 | (0,1,0.5)  | 25        | 100 | 0.4  | (0,2,0.5)   | 409       | 100 | 0.5   | (-1.0,2.0)   | 0.51    |
|                                                      | MC                  | 9         | 90  | 0.3 | (0,1,0.4)  | 17        | 68  | 0.3  | (0,1,0.4)   | 353       | 86  | -0.3  | (-1.8,1.2)   | 0.658   |
|                                                      | RC                  | -         | -   | -   | -          | 8         | 32  | 0.1  | (0,0,0.2)   | 40        | 10  | 4.9   | (-0.1,10.2)  | 0.056   |
|                                                      | Other               | 1         | 10  | 0.0 | (0,0,0.1)  | -         | -   | -    | -           | 16        | 4   | -2.4  | (-10.3,6.2)  | 0.57    |
| Adults (25-64)                                       | All                 | 196       | 100 | 0.9 | (0.7,1.0)  | 503       | 100 | 1.8  | (1.6,1.9)   | 8,848     | 100 | 3.2*  | (1.5,5.0)    | < 0.001 |
|                                                      | MC                  | 163       | 83  | 0.7 | (0.6,0.8)  | 309       | 61  | 1.1  | (1.0,1.2)   | 6,784     | 77  | 1.6   | (-2.1,5.4)   | 0.41    |
|                                                      | RC                  | 7         | 4   | 0.0 | (0,0,0.1)  | 187       | 37  | 0.7  | (0.6,0.8)   | 1,497     | 17  | 11.0* | (7.7,14.3)   | < 0.001 |
|                                                      | Other               | 26        | 13  | 0.1 | (0,1,0.2)  | 7         | 1   | 0.0  | (0,0,0.1)   | 567       | 6   | -2.8  | (-18.8,16.3) | 0.754   |
| Older People (65-84)                                 | All                 | 65        | 100 | 0.9 | (0.7,1.2)  | 222       | 100 | 2.6  | (2.2,2.9)   | 3,079     | 100 | 3.3*  | (1.7,4.8)    | < 0.001 |
|                                                      | MC                  | 45        | 69  | 0.7 | (0.5,0.8)  | 83        | 37  | 1.0  | (0.8,1.2)   | 1,721     | 56  | 0.1   | (-0.7,1.0)   | 0.735   |
|                                                      | RC                  | 3         | 5   | 0.1 | (0,0,0.2)  | 135       | 61  | 1.6  | (1.3,1.8)   | 1,000     | 32  | 11.6* | (9.4,14.0)   | < 0.001 |
|                                                      | Other               | 17        | 26  | 0.3 | (0,1,0.4)  | 4         | 2   | 0.1  | (0,0,0.1)   | 358       | 12  | -5.4  | (-15.9,6.5)  | 0.358   |
| Elderly (85+)                                        | All                 | 3         | 100 | 0.5 | (-0.1,1.1) | 14        | 100 | 1.0  | (0.5,1.5)   | 188       | 100 | 2.6*  | (0.7,4.6)    | 0.01    |
|                                                      | MC                  | -         | -   | -   | -          | 2         | 14  | 0.2  | (-0.1,0.6)  | 31        | 16  | -2.0  | (-5.2,1.2)   | 0.204   |
|                                                      | RC                  | -         | -   | -   | -          | 12        | 86  | 0.9  | (0.4,1.3)   | 100       | 53  | 3.5*  | (0.4,6.6)    | 0.03    |
|                                                      | Other               | 3         | 100 | 0.5 | (-0.1,1.1) | -         | -   | -    | -           | 57        | 30  | 2.4   | (-1.0,5.8)   | 0.16    |
| <b>Benign behavior - Endocrine CNS</b>               |                     |           |     |     |            |           |     |      |             |           |     |       |              |         |
| Pediatric (0-14)                                     | All                 | 1         | 100 | 0.0 | (0,0,0.1)  | 5         | 100 | 0.1  | (0,0,0.1)   | 101       | 100 | 2.3   | (-1.5,6.2)   | 0.228   |
|                                                      | MC                  | -         | -   | -   | -          | 3         | 60  | 0.0  | (0,0,0.1)   | 69        | 68  | -1.2  | (-4.9,2.6)   | 0.502   |
|                                                      | RC                  | -         | -   | -   | -          | 1         | 20  | 0.0  | (0,0,0.1)   | 25        | 25  | 4.2   | (-4.2,13.3)  | 0.302   |
|                                                      | Other               | 1         | 100 | 0.0 | (0,0,0.1)  | 1         | 20  | 0.0  | (0,0,0.1)   | 7         | 7   | -0.3  | (-0.9,0.2)   | 0.178   |
| Teenagers & Young Adults (15-24)                     | All                 | 23        | 100 | 0.4 | (0,2,0.5)  | 42        | 100 | 0.6  | (0,4,0.8)   | 717       | 100 | 1.1   | (-0.2,2.5)   | 0.096   |
|                                                      | MC                  | 13        | 57  | 0.2 | (0,1,0.3)  | 21        | 50  | 0.3  | (0,2,0.4)   | 449       | 63  | -0.6  | (-2.2,1.0)   | 0.436   |
|                                                      | RC                  | 1         | 4   | 0.0 | (0,0,0.1)  | 20        | 48  | 0.3  | (0,2,0.4)   | 195       | 27  | 7.2*  | (4.9,9.5)    | < 0.001 |
|                                                      | Other               | 9         | 39  | 0.1 | (0,0,0.2)  | 1         | 2   | 0.0  | (0,0,0.1)   | 73        | 10  | -3.1* | (-5.9,-0.3)  | 0.034   |
| Adults (25-64)                                       | All                 | 334       | 100 | 1.4 | (1.3,1.6)  | 508       | 100 | 1.8  | (1.6,1.9)   | 10,157    | 100 | 0.5   | (-3.7,4.8)   | 0.829   |
|                                                      | MC                  | 275       | 82  | 1.2 | (1.0,1.3)  | 352       | 69  | 1.2  | (1.1,1.4)   | 8,022     | 79  | 0.4   | (-0.2,1.1)   | 0.182   |
|                                                      | RC                  | 14        | 4   | 0.1 | (0,0,0.1)  | 147       | 29  | 0.5  | (0.4,0.6)   | 1,515     | 15  | 7.4*  | (1.4,13.7)   | 0.014   |
|                                                      | Other               | 45        | 13  | 0.2 | (0,1,0.2)  | 9         | 2   | 0.0  | (0,0,0.1)   | 620       | 6   | -2.2  | (-4.7,0.4)   | 0.094   |
| Older People (65-84)                                 | All                 | 123       | 100 | 1.8 | (1.5,2.1)  | 253       | 100 | 2.9  | (2.6,3.3)   | 4,758     | 100 | 2.2   | (-2.3,6.9)   | 0.346   |
|                                                      | MC                  | 81        | 66  | 1.2 | (0.9,1.4)  | 159       | 63  | 1.8  | (1.5,2.1)   | 3,355     | 71  | 2.1   | (-2.1,6.5)   | 0.331   |
|                                                      | RC                  | 11        | 9   | 0.2 | (0,1,0.3)  | 90        | 36  | 1.0  | (0.8,1.3)   | 978       | 21  | 8.3*  | (7.1,9.5)    | < 0.001 |
|                                                      | Other               | 31        | 25  | 0.5 | (0.3,0.6)  | 4         | 2   | 0.1  | (0,0,0.1)   | 425       | 9   | -6.8  | (-13.5,0.4)  | 0.063   |
| Elderly (85+)                                        | All                 | 6         | 100 | 0.8 | (0.1,1.4)  | 42        | 100 | 3.1  | (2.1,4.0)   | 423       | 100 | 6.5*  | (4.8,8.2)    | < 0.001 |
|                                                      | MC                  | 4         | 67  | 0.5 | (0.0,1.0)  | 5         | 12  | 0.6  | (0.1,1.1)   | 106       | 25  | 1.1   | (-1.1,3.3)   | 0.33    |
|                                                      | RC                  | -         | -   | -   | -          | 35        | 83  | 2.6  | (1.7,3.4)   | 216       | 51  | 9.6*  | (7.3,12.0)   | < 0.001 |
|                                                      | Other               | 2         | 33  | 0.3 | (-0.1,0.7) | 2         | 5   | 0.2  | (-0.1,0.4)  | 101       | 24  | -5.0  | (-11.8,2.3)  | 0.172   |

**Abbreviations:** MC, microscopically confirmed; RC, radiographically confirmed; CNS, central nervous system.

<sup>a</sup>Anatomical location based on the ICD-10 topography codes.

\*Indicates a statistically significant departure (p<0.05) from a slope of 0.

**Supplementary Table 5d. Age-Sex-Standardized Incidence Rates (ASR) per 100,000 for calendar years 1993 and 2017 separately and Average Annual Percentage Change (AAPC) for 188,340 individuals diagnosed with a primary CNS tumor according to behavior, anatomical location<sup>a</sup> and method of diagnosis – England, 1993-2017 - Uncertain tumors only**

| Characteristic                                          | Method of Diagnosis | 1993 only |     |     |            | 2017 only |     |     |            | 1993-2017 |     |        |              |         |
|---------------------------------------------------------|---------------------|-----------|-----|-----|------------|-----------|-----|-----|------------|-----------|-----|--------|--------------|---------|
|                                                         |                     | n         | %   | ASR | 95% CI     | n         | %   | ASR | 95% CI     | n         | %   | AAPC   | 95% CI       | P-Value |
| <b>Uncertain behavior - Meninges</b>                    |                     |           |     |     |            |           |     |     |            |           |     |        |              |         |
| Pediatric (0-14)                                        | All                 | –         | –   | –   | –          | 1         | 100 | 0.0 | (0,0,0.1)  | 28        | 100 | 4.0*   | (1.4,6.8)    | 0.005   |
|                                                         | MC                  | –         | –   | –   | –          | 1         | 100 | 0.0 | (0,0,0.1)  | 25        | 89  | 3.9*   | (0.9,7.0)    | 0.014   |
|                                                         | RC                  | –         | –   | –   | –          | –         | –   | –   | –          | 1         | 4   | –      | –            | –       |
|                                                         | Other               | –         | –   | –   | –          | –         | –   | –   | –          | 2         | 7   | 2.5    | –            | –       |
| Teenagers & Young Adults (15-24)                        | All                 | –         | –   | –   | –          | 3         | 100 | 0.0 | (0,0,0.1)  | 40        | 100 | 2.6    | (-0.9,6.2)   | 0.139   |
|                                                         | MC                  | –         | –   | –   | –          | 3         | 100 | 0.0 | (0,0,0.1)  | 39        | 98  | 2.5    | (-1.4,6.5)   | 0.189   |
|                                                         | RC                  | –         | –   | –   | –          | –         | –   | –   | –          | 0         | 0   | –      | –            | –       |
|                                                         | Other               | –         | –   | –   | –          | –         | –   | –   | –          | 1         | 3   | –      | –            | –       |
| Adults (25-64)                                          | All                 | 3         | 100 | 0.0 | (0,0,0.1)  | 153       | 100 | 0.5 | (0,5,0.6)  | 1,476     | 100 | 12.2*  | (10.1,14.4)  | < 0.001 |
|                                                         | MC                  | 2         | 67  | 0.0 | (0,0,0.1)  | 147       | 96  | 0.5 | (0,4,0.6)  | 1,364     | 92  | 13.0*  | (10.2,15.9)  | < 0.001 |
|                                                         | RC                  | 1         | 33  | 0.0 | (0,0,0.1)  | 6         | 4   | 0.1 | (0,0,0.1)  | 66        | 4   | 3.4*   | (1.7,5.0)    | 0.001   |
|                                                         | Other               | –         | –   | –   | –          | –         | –   | –   | –          | 46        | 3   | -1.1   | (-2.9,0.7)   | 0.2     |
| Older People (65-84)                                    | All                 | 1         | 100 | 0.0 | (0,0,0.1)  | 93        | 100 | 1.1 | (0.9,1.3)  | 1,035     | 100 | 11.0*  | (7.9,14.1)   | < 0.001 |
|                                                         | MC                  | 1         | 100 | 0.0 | (0,0,0.1)  | 81        | 87  | 0.9 | (0.7,1.1)  | 830       | 80  | 15.0*  | (11.9,18.3)  | < 0.001 |
|                                                         | RC                  | –         | –   | –   | –          | 9         | 10  | 0.1 | (0,0,0.2)  | 127       | 12  | 4.5*   | (2.2,6.9)    | < 0.001 |
|                                                         | Other               | –         | –   | –   | –          | 3         | 3   | 0.0 | (0,0,0.1)  | 78        | 8   | -0.7   | (-2.9,1.6)   | 0.531   |
| Elderly (85+)                                           | All                 | –         | –   | –   | –          | 9         | 100 | 0.7 | (0.2,1.1)  | 121       | 100 | 5.1*   | (1.9,8.3)    | 0.003   |
|                                                         | MC                  | –         | –   | –   | –          | 2         | 22  | 0.2 | (-0.1,0.6) | 23        | 19  | 7.4*   | (0.7,14.5)   | 0.033   |
|                                                         | RC                  | –         | –   | –   | –          | 7         | 78  | 0.5 | (0.1,0.9)  | 56        | 46  | 1.6    | (-2.5,5.9)   | 0.423   |
|                                                         | Other               | –         | –   | –   | –          | –         | –   | –   | –          | 42        | 35  | 2.0    | (-1.8,5.9)   | 0.289   |
| <b>Uncertain behavior - Brain</b>                       |                     |           |     |     |            |           |     |     |            |           |     |        |              |         |
| Pediatric (0-14)                                        | All                 | 14        | 100 | 0.2 | (0,1,0.2)  | 42        | 100 | 0.4 | (0,3,0.5)  | 2,278     | 100 | 2.5*   | (1.8,3.3)    | < 0.001 |
|                                                         | MC                  | 6         | 43  | 0.1 | (0,0,0.1)  | 31        | 74  | 0.3 | (0,2,0.4)  | 2,082     | 91  | 4.5*   | (1.7,7.5)    | 0.002   |
|                                                         | RC                  | 1         | 7   | 0.0 | (0,0,0.1)  | 10        | 24  | 0.1 | (0,0,0.2)  | 130       | 6   | 3.1*   | (1.1,5.1)    | 0.004   |
|                                                         | Other               | 7         | 50  | 0.1 | (0,0,0.1)  | 1         | 2   | 0.0 | (0,0,0.1)  | 66        | 3   | -2.5*  | (-4.4,-0.6)  | 0.015   |
| Teenagers & Young Adults (15-24)                        | All                 | 4         | 100 | 0.1 | (0,0,0.1)  | 26        | 100 | 0.4 | (0.2,0.5)  | 932       | 100 | 3.9*   | (2.7,5.2)    | < 0.001 |
|                                                         | MC                  | 3         | 75  | 0.0 | (0,0,0.1)  | 23        | 88  | 0.3 | (0.2,0.5)  | 823       | 88  | 4.1*   | (2.8,5.3)    | < 0.001 |
|                                                         | RC                  | –         | –   | –   | –          | 3         | 12  | 0.0 | (0,0,0.1)  | 66        | 7   | 3.7*   | (0.7,2.7)    | 0.039   |
|                                                         | Other               | 1         | 25  | 0.0 | (0,0,0.1)  | –         | –   | –   | –          | 43        | 5   | -3.5*  | (-6.3,-0.6)  | 0.021   |
| Adults (25-64)                                          | All                 | 73        | 100 | 0.3 | (0.2,0.4)  | 143       | 100 | 0.5 | (0.4,0.6)  | 3,872     | 100 | 1.6*   | (0.9,2.2)    | < 0.001 |
|                                                         | MC                  | 23        | 32  | 0.1 | (0.1,0.1)  | 96        | 67  | 0.3 | (0.3,0.4)  | 2,471     | 64  | 5.3*   | (2.4,8.3)    | < 0.001 |
|                                                         | RC                  | 10        | 14  | 0.1 | (0.0,0.1)  | 42        | 29  | 0.1 | (0.1,0.2)  | 694       | 18  | 1.5    | (-1.7,4.7)   | 0.615   |
|                                                         | Other               | 40        | 55  | 0.2 | (0.1,0.2)  | 5         | 3   | 0.0 | (0,0,0.1)  | 707       | 18  | -5.0*  | (-6.2,-3.8)  | < 0.001 |
| Older People (65-84)                                    | All                 | 180       | 100 | 2.6 | (2.3,3.0)  | 108       | 100 | 1.2 | (1.0,1.5)  | 4,822     | 100 | -3.8*  | (-5.5,-2.1)  | < 0.001 |
|                                                         | MC                  | 11        | 6   | 0.2 | (0.1,0.3)  | 21        | 19  | 0.3 | (0.2,0.4)  | 599       | 12  | 2.7*   | (0.3,5.2)    | 0.028   |
|                                                         | RC                  | 43        | 24  | 0.6 | (0.4,0.8)  | 74        | 69  | 0.8 | (0.7,1.0)  | 2,052     | 43  | 0.4    | (-1.5,2.3)   | 0.698   |
|                                                         | Other               | 126       | 70  | 1.8 | (1.5,2.2)  | 13        | 12  | 0.2 | (0.1,0.2)  | 2,171     | 45  | -11.4* | (-15.3,-7.3) | < 0.001 |
| Elderly (85+)                                           | All                 | 25        | 100 | 2.9 | (1.7,4.1)  | 37        | 100 | 2.8 | (1.9,3.7)  | 1,502     | 100 | -1.3   | (-4.1,1.6)   | 0.37    |
|                                                         | MC                  | 2         | 8   | 0.3 | (-0.1,0.7) | 1         | 3   | 0.1 | (-0.1,0.3) | 43        | 3   | -2.9   | (-6.6,0.9)   | 0.12    |
|                                                         | RC                  | 9         | 36  | 1.0 | (0.3,1.7)  | 33        | 89  | 2.5 | (1.6,3.3)  | 722       | 48  | 4.2*   | (1.9,6.5)    | < 0.001 |
|                                                         | Other               | 14        | 56  | 1.6 | (0.8,2.5)  | 3         | 8   | 0.2 | (0,0,0.5)  | 737       | 49  | -9.5*  | (-14.9,-3.8) | 0.001   |
| <b>Uncertain behavior - Spinal Cord &amp; Other CNS</b> |                     |           |     |     |            |           |     |     |            |           |     |        |              |         |
| Pediatric (0-14)                                        | All                 | 9         | 100 | 0.1 | (0,0,0.2)  | 12        | 100 | 0.1 | (0.1,0.2)  | 322       | 100 | 1.4    | (-0.6,3.3)   | 0.157   |
|                                                         | MC                  | 6         | 67  | 0.1 | (0,0,0.1)  | 6         | 50  | 0.1 | (0,0,0.1)  | 255       | 79  | 1.1    | (-0.6,2.7)   | 0.194   |
|                                                         | RC                  | –         | –   | –   | –          | 5         | 42  | 0.0 | (0,0,0.1)  | 50        | 16  | 3.0*   | (0.8,5.3)    | 0.008   |
|                                                         | Other               | 3         | 33  | 0.1 | (0,0,0.2)  | 1         | 8   | 0.0 | (0,0,0.1)  | 17        | 5   | -5.4*  | (-6.3,-4.4)  | < 0.001 |
| Teenagers & Young Adults (15-24)                        | All                 | 2         | 100 | 0.1 | (0,0,0.1)  | 7         | 100 | 0.1 | (0,0,0.2)  | 158       | 100 | 3.6*   | (1.7,5.6)    | 0.001   |
|                                                         | MC                  | 1         | 50  | 0.0 | (0,0,0.1)  | 6         | 86  | 0.1 | (0,0,0.2)  | 141       | 89  | 4.2*   | (2.1,6.3)    | < 0.001 |
|                                                         | RC                  | –         | –   | –   | –          | 1         | 14  | 0.0 | (0,0,0.1)  | 9         | 6   | -0.1   | (-0.7,0.4)   | 0.566   |
|                                                         | Other               | 1         | 50  | 0.0 | (0,0,0.1)  | –         | –   | –   | –          | 8         | 5   | -0.6   | (-1.4,0.3)   | 0.158   |
| Adults (25-64)                                          | All                 | 26        | 100 | 0.1 | (0.1,0.1)  | 69        | 100 | 0.2 | (0.2,0.3)  | 1,019     | 100 | 4.1    | (-0.1,8.4)   | 0.055   |
|                                                         | MC                  | 17        | 65  | 0.1 | (0.0,0.1)  | 55        | 80  | 0.2 | (0.1,0.2)  | 836       | 82  | 3.8*   | (0.2,7.6)    | 0.039   |
|                                                         | RC                  | 2         | 8   | 0.1 | (0.0,0.1)  | 13        | 19  | 0.1 | (0,0,0.1)  | 93        | 9   | 2.5    | (-2.1,7.4)   | 0.295   |
|                                                         | Other               | 7         | 27  | 0.0 | (0,0,0.1)  | 1         | 1   | 0.0 | (0,0,0.1)  | 90        | 9   | 0.9    | (-1.5,3.3)   | 0.447   |
| Older People (65-84)                                    | All                 | 17        | 100 | 0.2 | (0.1,0.4)  | 27        | 100 | 0.3 | (0.2,0.4)  | 338       | 100 | 2.7    | (-0.2,5.7)   | 0.068   |
|                                                         | MC                  | 2         | 12  | 0.1 | (0.0,0.1)  | 15        | 56  | 0.2 | (0.1,0.3)  | 138       | 41  | 3.5*   | (0.5,6.7)    | 0.022   |
|                                                         | RC                  | 4         | 24  | 0.1 | (0.0,0.2)  | 12        | 44  | 0.1 | (0.1,0.2)  | 93        | 28  | 3.5*   | (1.0,6.0)    | 0.008   |
|                                                         | Other               | 11        | 65  | 0.2 | (0.1,0.3)  | –         | –   | –   | –          | 107       | 32  | -3.8*  | (-5.3,-2.2)  | < 0.001 |
| Elderly (85+)                                           | All                 | 3         | 100 | 0.4 | (-0.1,0.8) | 1         | 100 | 0.1 | (-0.1,0.3) | 37        | 100 | -1.4   | (-4.0,1.3)   | 0.291   |
|                                                         | MC                  | –         | –   | –   | –          | –         | –   | –   | –          | 4         | 11  | -6.0   | (-54.8,95.5) | 0.751   |
|                                                         | RC                  | 2         | 67  | 0.4 | (-0.1,0.8) | 1         | 100 | 0.1 | (-0.1,0.3) | 17        | 46  | -2.0   | (-4.6,0.7)   | 0.128   |
|                                                         | Other               | 1         | 33  | 0.4 | (-0.4,1.2) | –         | –   | –   | –          | 16        | 43  | -2.5   | (-6.7,2.0)   | 0.233   |
| <b>Uncertain behavior - Endocrine CNS</b>               |                     |           |     |     |            |           |     |     |            |           |     |        |              |         |
| Pediatric (0-14)                                        | All                 | 23        | 100 | 0.3 | (0.2,0.4)  | 24        | 100 | 0.2 | (0.1,0.3)  | 466       | 100 | -0.8   | (-1.7,0.2)   | 0.122   |
|                                                         | MC                  | 18        | 78  | 0.2 | (0.1,0.3)  | 19        | 79  | 0.2 | (0.1,0.3)  | 391       | 84  | -1.1*  | (-2.2,-0.1)  | 0.038   |
|                                                         | RC                  | 3         | 13  | 0.0 | (0,0,0.1)  | 3         | 13  | 0.1 | (0,0,0.2)  | 46        | 10  | 2.1    | (-0.3,4.5)   | 0.086   |
|                                                         | Other               | 2         | 9   | 0.1 | (0,0,0.2)  | 2         | 8   | 0.1 | (0,0,0.1)  | 29        | 6   | -0.5   | (-3.1,2.1)   | 0.66    |
| Teenagers & Young Adults (15-24)                        | All                 | 3         | 100 | 0.1 | (0,0,0.2)  | 18        | 100 | 0.3 | (0.1,0.4)  | 267       | 100 | 0.6    | (-0.8,2.0)   | 0.385   |
|                                                         | MC                  | 2         | 67  | 0.1 | (0,0,0.1)  | 13        | 72  | 0.2 | (0.1,0.3)  | 180       | 67  | 0.5    | (-1.2,2.3)   | 0.536   |
|                                                         | RC                  | –         | –   | –   | –          | 4         | 22  | 0.1 | (0,0,0.2)  | 41        | 15  | 4.9*   | (1.8,8.1)    | 0.004   |
|                                                         | Other               | 1         | 33  | 0.0 | (0,0,0.1)  | 1         | 6   | 0.0 | (0,0,0.1)  | 46        | 17  | -3.9*  | (-7.1,-0.5)  | 0.026   |
| Adults (25-64)                                          | All                 | 30        | 100 | 0.2 | (0.1,0.2)  | 54        | 100 | 0.2 | (0.1,0.2)  | 1,393     | 100 | 1.5    | (-2.4,5.6)   | 0.453   |
|                                                         | MC                  | 18        | 60  | 0.1 | (0.0,0.1)  | 38        | 70  | 0.1 | (0.1,0.2)  | 932       | 67  | 0.1    | (-1.0,1.2)   | 0.886   |
|                                                         | RC                  | 5         | 17  | 0.1 | (0.0,0.1)  | 10        | 19  | 0.0 | (0,0,0.1)  | 192       | 14  | 0.2    | (-1.6,2.0)   | 0.843   |
|                                                         | Other               | 7         | 23  | 0.1 | (0,0,0.1)  | 6         | 11  | 0.0 | (0,0,0.1)  | 269       | 19  | -2.6   | (-5.9,0.8)   | 0.133   |
| Older People (65-84)                                    | All                 | 5         | 100 | 0.1 | (0,0,0.3)  | 23        | 100 | 0.3 | (0.2,0.4)  | 732       | 100 | -0.5   | (-2.4,1.4)   | 0.612   |
|                                                         | MC                  | –         | –   | –   | –          | 16        | 70  | 0.2 | (0.1,0.3)  | 292       | 40  | 1.8    | (-0.9,4.7)   | 0.193   |
|                                                         | RC                  | 1         | 20  | 0.0 | (0,0,0.1)  | 4         | 17  | 0.1 | (0,0,0.2)  | 195       | 27  | 0.5    | (-1.5,2.4)   | 0.623   |
|                                                         | Other               | 4         | 80  | 0.1 | (0,0,0.2)  | 3         | 13  | 0.0 | (0,0,0.1)  | 245       | 33  | -6.1*  | (-11.1,-0.8) | 0.024   |
| Elderly (85+)                                           | All                 | 2         | 100 | 0.3 | (-0.1,0.7) | 2         | 100 | 0.4 | (-0.2,1.0) | 113       | 100 | 0.3    | (-2.9,3.5)   | 0.868   |
|                                                         | MC                  | –         | –   | –   | –          | –         | –   | –   | –          | 5         | 4   | -0.3   | (-15.9,18.2) | 0.955   |
|                                                         | RC                  | –         | –   | –   | –          | 2         | 100 | 0.4 | (-0.2,1.0) | 51        | 45  | -0.5   | (-5.5,4.7)   | 0.835   |
|                                                         | Other               | 2         | 100 | 0.3 | (-0.1,0.7) | –         | –   | –   | –          | 57        | 50  | -1.4   | (-4.2,1.5)   | 0.33    |

**Abbreviations:** MC, microscopically confirmed; RC, radiographically confirmed; CNS, central nervous system.

<sup>a</sup>Anatomical location based on the ICD-10 topography codes.

\*Indicates a statistically significant departure (p<0.05) from a slope of 0.

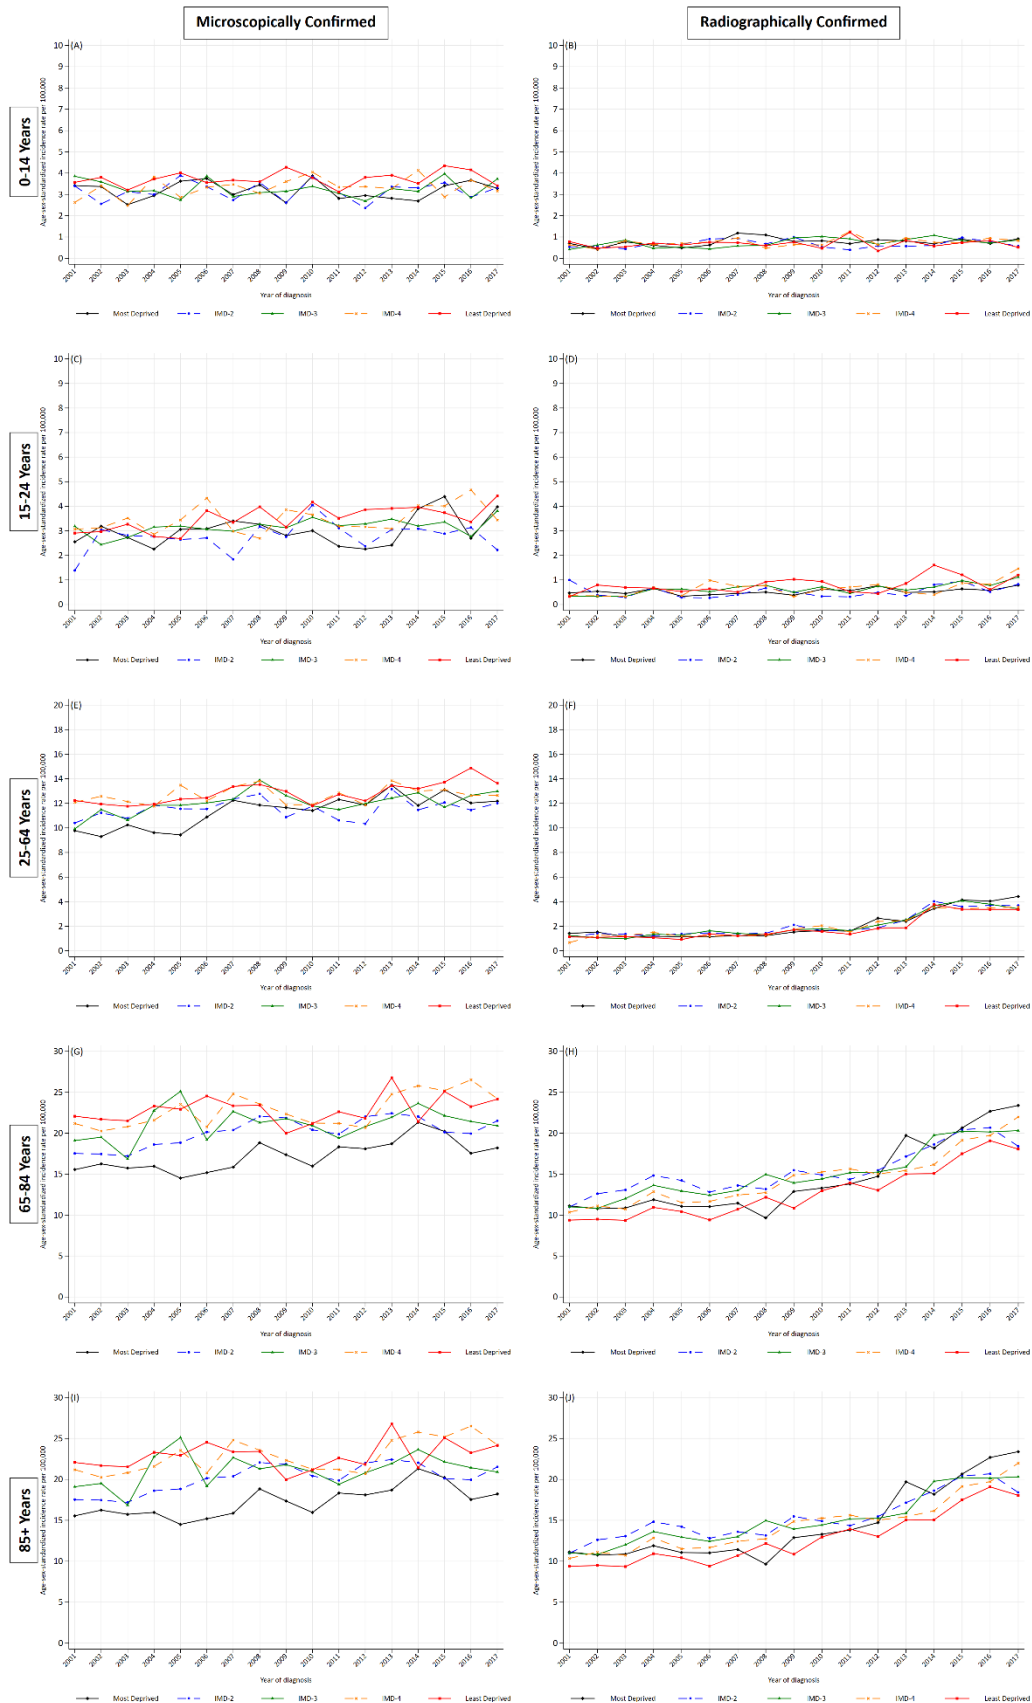

IMD - Index of Multiple Deprivation

**Supplementary Figure 2. Incidence rate of primary CNS tumors by method of diagnosis, age-group and index of multiple deprivation (IMD) - England, 2001-2017**

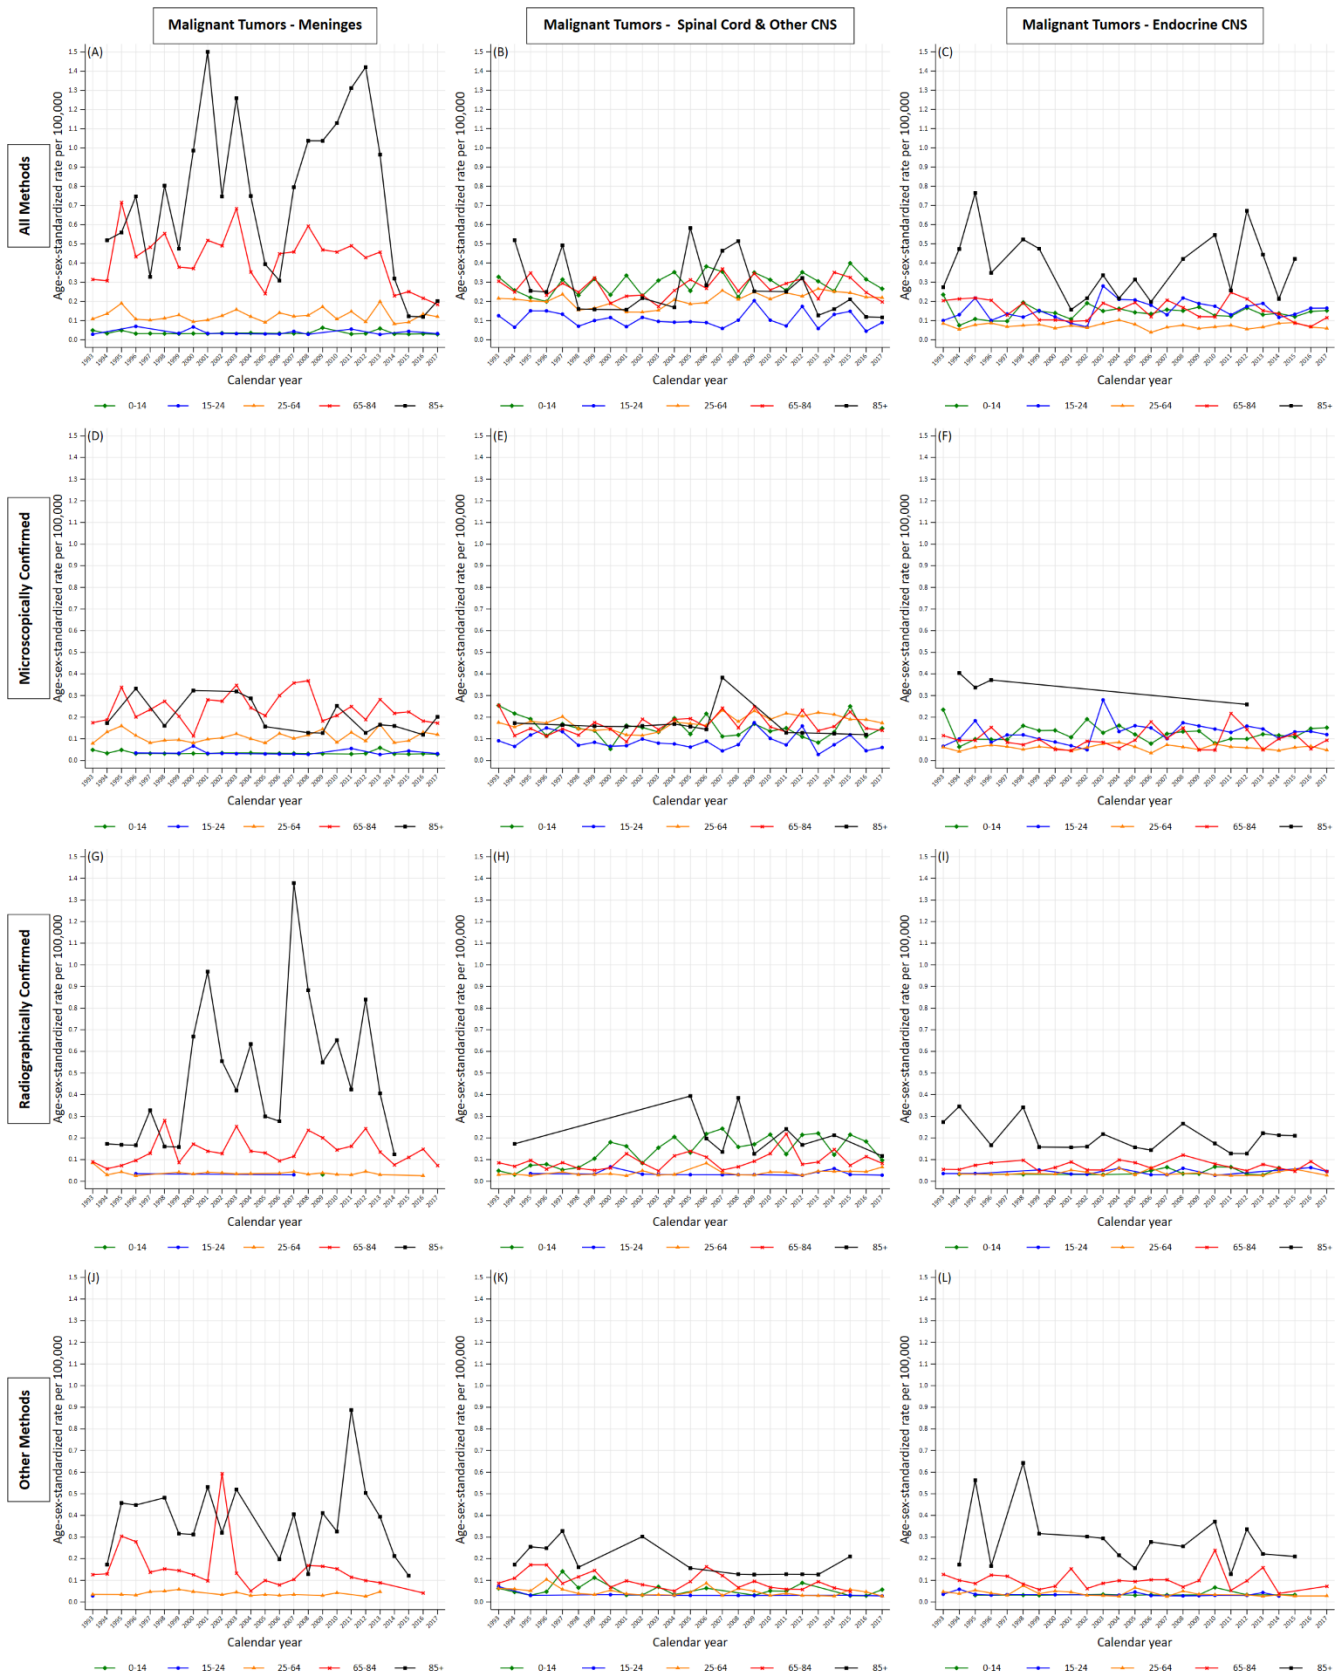

**Supplementary Figure 3. Incidence of primary CNS tumors by anatomical location (malignant tumors only), method of diagnosis and age-group - England, 1993-2017**

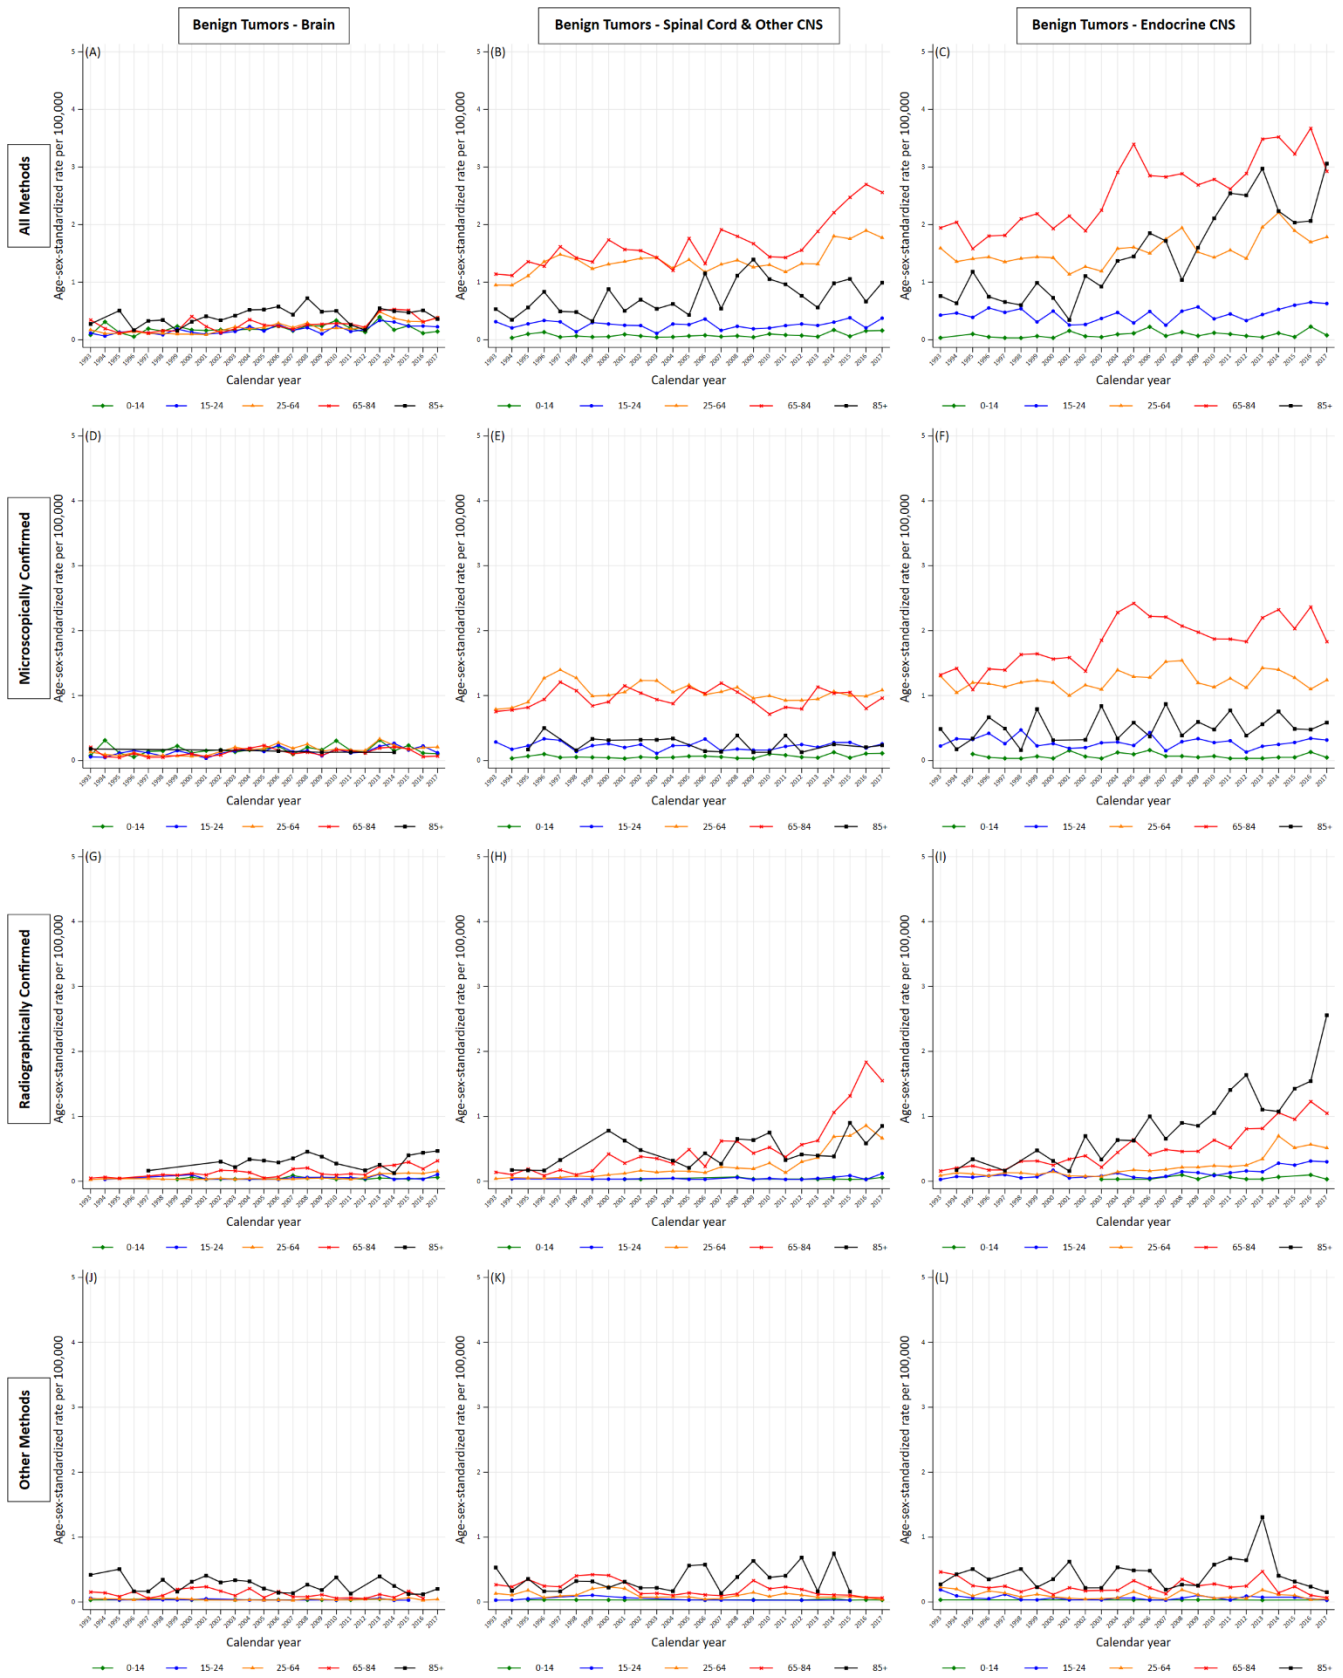

**Supplementary Figure 4. Incidence of primary CNS tumors by anatomical location (benign tumors only), method of diagnosis and age-group - England, 1993-2017**



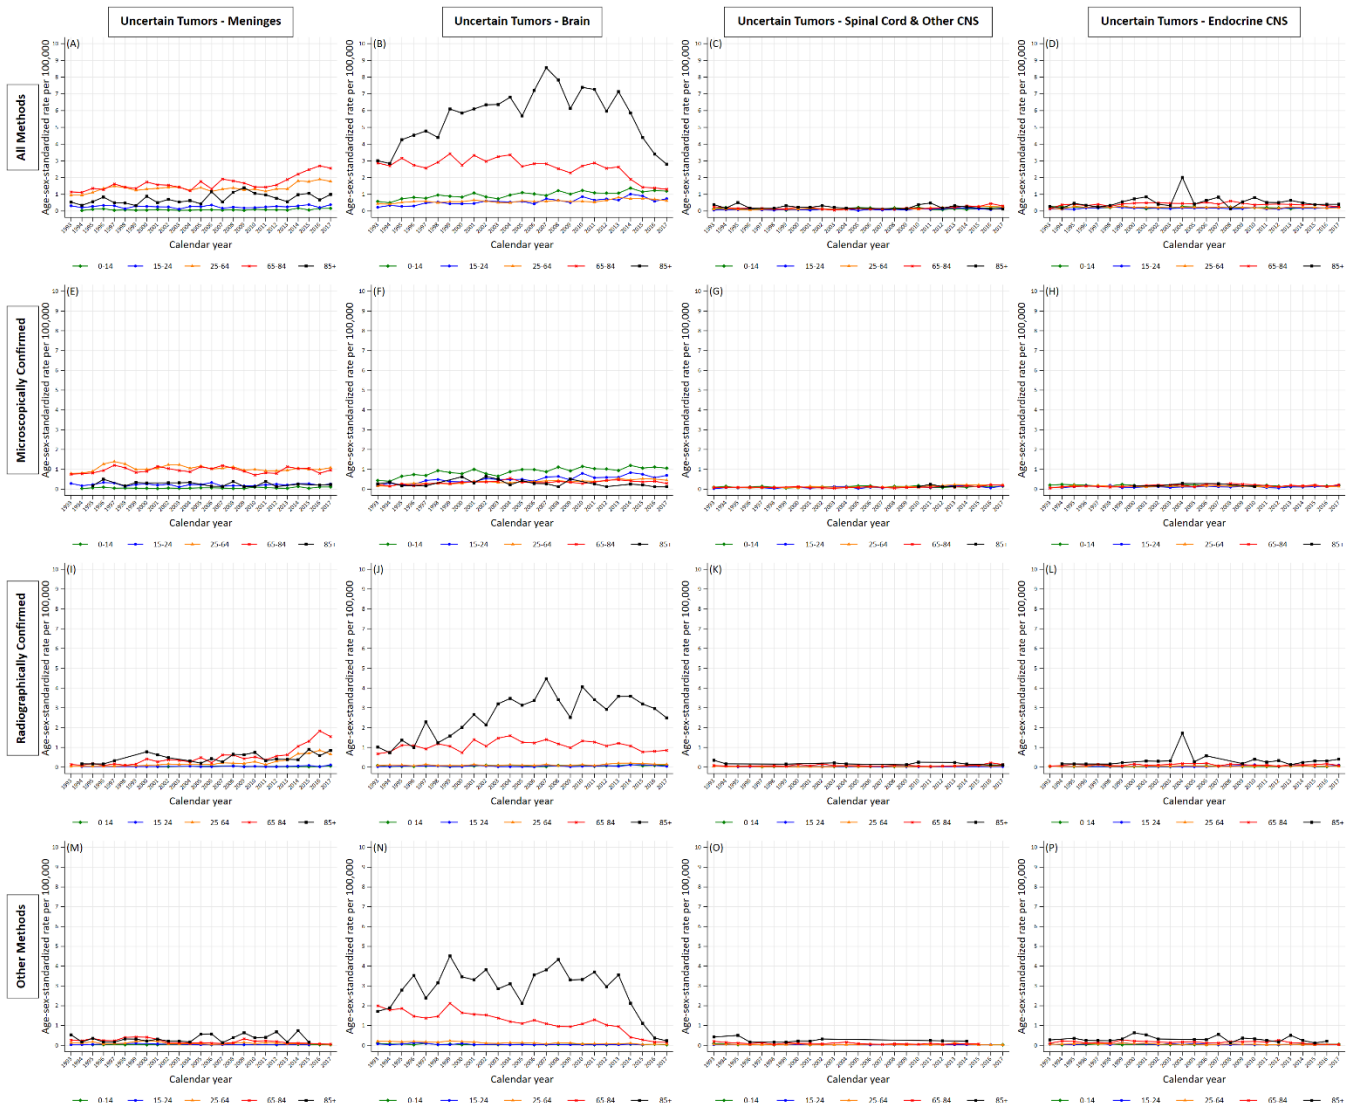

**Supplementary Figure 5. Incidence of primary CNS tumors by anatomical location (uncertain tumors only), method of diagnosis and age-group - England, 1993-2017**
